RESEARCH ARTICLE

# Genome-wide analysis of the NAC transcription factor family and their expression during the development and ripening of the *Fragaria × ananassa* fruits

Enriqueta Moyano<sup>1</sup>, Félix J. Martínez-Rivas<sup>1</sup>, Rosario Blanco-Portales<sup>1</sup>, Francisco Javier Molina-Hidalgo<sup>1</sup>, Pablo Ric-Varas<sup>2</sup>, Antonio J. Matas-Arroyo<sup>2</sup>, José Luis Caballero<sup>1</sup>, Juan Muñoz-Blanco<sup>1</sup>, Antonio Rodríguez-Franco<sup>1\*</sup>

**1** Departamento de Bioquímica y Biología Molecular, Campus de Rabanales, Edificio Severo Ochoa, Universidad de Córdoba, Córdoba, Spain, **2** Instituto de Hortofruticultura Subtropical y Mediterránea “La Mayora” (IHSM-UMA-CSIC), Departamento de Biología Vegetal, Universidad de Málaga, Málaga, Spain

\* [arfranco@uco.es](mailto:arfranco@uco.es)

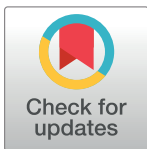

**OPEN ACCESS**

**Citation:** Moyano E, Martínez-Rivas FJ, Blanco-Portales R, Molina-Hidalgo FJ, Ric-Varas P, Matas-Arroyo AJ, et al. (2018) Genome-wide analysis of the NAC transcription factor family and their expression during the development and ripening of the *Fragaria × ananassa* fruits. PLoS ONE 13(5): e0196953. <https://doi.org/10.1371/journal.pone.0196953>

**Editor:** Serena Aceto, University of Naples Federico II, ITALY

**Received:** February 17, 2018

**Accepted:** April 23, 2018

**Published:** May 3, 2018

**Copyright:** © 2018 Moyano et al. This is an open access article distributed under the terms of the [Creative Commons Attribution License](https://creativecommons.org/licenses/by/4.0/), which permits unrestricted use, distribution, and reproduction in any medium, provided the original author and source are credited.

**Data Availability Statement:** Microarray data are found in GEO databasem accession number GSE95300.

**Funding:** This work was supported by AGL2014-55784-C2 from the Spanish Ministerio de Ciencia e Innovación.

**Competing interests:** The authors have declared that no competing interests exist.

## Abstract

NAC proteins are a family of transcription factors which have a variety of important regulatory roles in plants. They present a very well conserved group of NAC subdomains in the N-terminal region and a highly variable domain at the C-terminus. Currently, knowledge concerning NAC family in the strawberry plant remains very limited. In this work, we analyzed the NAC family of *Fragaria vesca*, and a total of 112 NAC proteins were identified after we curated the annotations from the version 4.0.a1 genome. They were placed into the ligation groups (pseudo-chromosomes) and described its physicochemical and genetic features. A microarray transcriptomic analysis showed six of them expressed during the development and ripening of the *Fragaria × ananassa* fruit. Their expression patterns were studied in fruit (receptacle and achenes) in different stages of development and in vegetative tissues. Also, the expression level under different hormonal treatments (auxins, ABA) and drought stress was investigated. In addition, they were clustered with other NAC transcription factor with known function related to growth and development, senescence, fruit ripening, stress response, and secondary cell wall and vascular development. Our results indicate that these six strawberry NAC proteins could play different important regulatory roles in the process of development and ripening of the fruit, providing the basis for further functional studies and the selection for NAC candidates suitable for biotechnological applications.

## Introduction

Strawberry (*Fragaria × ananassa*) is a non-climacteric model plant of economic importance due both its edibility and healthy values. It contains numerous compounds such as vitamin C, folic acid, anthocyanins, flavonoids, and phenolic acids with important biological activities useful in the prevention of diseases related to the oxidative stress [1]. Ripening is an essential

process determining fruit quality and involves many physiological and biochemical modifications. In strawberry, the most noticeable changes include alterations of fruit size, texture, color, and aroma that are associated to the activity of many different genes already identified [2]. The regulation of strawberry fruit ripening is rather complex. It is known that auxins and ABA are the main hormones controlling this process, but other plant hormones as jasmonate, ethylene and gibberellins are also involved [2, 3]. There is also some evidence for a relevant sucrose-mediated ripening [4]. Many different transcription factors (TFs) are also playing key roles in these processes [2, 3]. Some of them, like the master regulator FaMYB10 [5], FaEOBII [6], FaDOF2 [7] and others [2, 8] have already been examined. However, it remains unknown the role played for the NAC (NAM, ATAF1/2 and CUC2) proteins, one of the largest families of plant-specific TFs present in a wide range of species [9,10].

The NAC family proteins play important regulatory roles in plants including flowering [11], root formation [12], senescence [10, 13], shoot branching [14], responses to diverse abiotic and biotic stress such as salinity, drought and chilling [9, 15] and interaction with fungal and bacterial pathogens [16, 17]. In addition, NAC TFs are involved in various aspects of fruit ripening. For example, the tomato NAC-NOR (non-ripening) is an important TF whose mutation lead to a non-ripening phenotype affected in many ripening-related aspects [18]. The tomato SINAC1 and SINAC4 proteins regulate carotenoid biosynthesis, ethylene emission, and the softening of the fruit [19, 20, 21]. In banana, MaNAC1/MaNAC2 regulate fruit ripening via physical interaction with ethylene signaling components [22]. A NAC TF termed BLOOD form a heterodimer with other NACs to induce the transcription of *PpMYB10*, leading to the accumulation of anthocyanin in peach fruits [23]. Recently, LcNAC1 has been proposed as a regulator of fruit senescence in litchi [24]. However, the number of studies relating to NAC TFs in fruit development and specifically in non-climacteric fruits is scarce.

Most of NAC proteins have a conserved DNA-binding NAC domain of approximately 150 amino acids found mainly at the N-terminus of the protein, and a highly variable transcriptional regulatory region in the C-terminal region [25, 26]. The NAC domain is usually divided into five subdomains (A–E). The C and D subdomains are positively charged and allow the TF to bind to the DNA. The A subdomain can promote functional dimerization, and the variable subdomains B and E may be involved in the many distinctive functions of the NAC proteins. The C-terminal transcription regulatory region can either activate or repress transcription, and in some cases, can also bind to other proteins [10, 25, 26]. Several specific and conserved motifs for certain subgroups of NAC subfamilies have been determined at the C-terminal region but diverge among the different NAC subfamilies. This variation has also been occasionally correlated with the distinct functions of NAC proteins [17, 26]. A transmembrane motif is sometimes present in the C-terminal region of many NACs proteins that allow the translocation of the protein to the nucleus after proteolytic cleavage and under different stress conditions [10, 26, 27, 28].

The availability of the strawberry whole genome sequence is a valuable resource to identify gene families and gain further insight into their functions. Gene-wide analyses are used as a foundation to dissect and deduce the functions of determined genes. A recent example is the study of the strawberry *WRKY* genes implied in pathogen resistance and stress tolerance [29]. In this study, we present a genome-wide analysis of the NAC TFs in the diploid *Fragaria vesca* that includes a strawberry database search using the genome version 4.0.a1, an annotation curation, a phylogeny study, a description of the gene structure, and an assignation to their ligation group (pseudo-chromosoma) locations. Additionally, we analyzed several strawberry NAC proteins that, according a microarray analysis [3], are implied in the development and ripening of the commercial *Fragaria x ananassa* fruit. A total of 112 NAC genes have been

found in strawberry. Six of them were expressed throughout the fruit development and/or ripening and were characterized through quantitative real time PCR analyses in the receptacle, achenes and in various vegetative tissues. In addition, we investigated their expression level under different hormonal treatments and stress conditions (auxins, ABA, and drought). Finally, some biological functions to these fruit-related proteins were putatively assigned after performing alignments with Arabidopsis NAC sequences and with a set of 61 NAC proteins with known functions from different plant species. Our results show that the six ripening-related NAC TF studied are suitable candidate genes for running further functional genomics research to develop biotechnological approaches to improve strawberry fruit quality attributes and their postharvest shelf life.

## Materials and methods

### Identification and curation of putative *Fragaria* NAC genes

A list of putative NAC-containing genes from *Fragaria vesca* was obtained from the public version 4.0.a1 strawberry genomic database (<http://bit.ly/Fragaria4genome>). We searched within the annotations looking for the term “NAC” using the bash grep command to find all the NAC-related sequences. In addition, a BlastP was performed using several of the sequences containing the NAC domains within *F. vesca* genome against the same genome using the facilities found in the rosacea.org web. The information found in the plant transcription factor database (PlantTFDB) was initially discarded because it is still based on the outdated version v1.1 annotation of the *Fragaria* genome. These genes and their structures can be used for the study of the commercial octoploid *Fragaria* × *ananassa* plants, since both plants shares the same genome structure and higher than 98% identity at the nucleotide level in all genes analyzed to date [30]. This agrees with higher than 93% of paired-end lectures of *Fragaria* × *ananassa* mapped with Tophat to the *F. vesca* reference genome using standard settings (results not shown).

The initial list of NAC annotations needed to be curated since the current version 4.0.a1 of the assembled strawberry genome retains still some uncertainties. We removed those sequences that even being initially annotated as a NAC protein, lacked the whole or had an almost incomplete NAC multi-domain. This was assessed by analyzing the presence of the NAC subdomains using MEME (<http://meme-suite.org/tools/meme>), by scanning into the InterPro and the Pfam domains databases, and by using the information provided in the NCBI Conserved Domains Database (CDD). A summary of discarded sequences can be found in [S1](#) and [S2](#) Tables.

### Analysis of the *Fragaria* NAC proteins and chromosomal location

Gene sequences and their location in the strawberry chromosomes were obtained from the public genome database. Version 4.0.a1 was used, which was assembled through Bionano optical maps and SMART (Pacific Bioscience) sequencing. Amino acid lengths, molecular weights, isoelectric points, and other physicochemical features of the NAC proteins were obtained using the EMBOSS *pepstats* (<http://www.ebi.ac.uk/Tools/emboss>) and the ExPASy *protparam* programs (<http://expasy.org>). A genomic map including the location of the NAC genes was drawn using the Mapchart v2.30 software [31].

### Domain and motif finding in the *Fragaria* NAC family

An initial search for putative motifs and/or domains that were in common among the strawberry NAC proteins was done using the MEME program, version 4.11.0 [32]. This was set in

normal mode, for any number of occurrences per sequence, and allowing up to 15 different motifs per sequence with a length ranged between 5 to 100 amino acids. Reliability of the MEME predicted trees was tested by the neighbor-joining method with 1000 bootstrap replicates using the IQ-tree web server [33]. Other motifs and domains present in the NAC family were investigated following different approaches. We run an InterProScan search (<http://www.ebi.ac.uk/Tools/pfa/iprscan>) [34] looking for already featured domains and motifs. This information was completed with another scan done with the Conserved Domain Architecture Retrieval Tools (CDART) database, which is useful because it finds protein similarities using sensitive protein domain profiles rather than strict rules of identity homology (<https://www.ncbi.nlm.nih.gov/Structure/lexington/lexington.cgi>) [35]. Since some NAC sequences contain relevant transmembrane helices, a prediction of these domains was performed with the TMHMM v2.0 server (<http://www.cbs.dtu.dk/services/TMHMM/>) [36].

### Assignment of putative functions to the *Fragaria* fruit related NAC genes

Current annotations of the *F. vesca* database do not contain any specific mention to the putative biological functions played by the NAC proteins, but do include cross references to orthologous *Arabidopsis thaliana* genes. Thus, we accessed the TAIR (<https://www.arabidopsis.org/>) database to gather information about the biological role played by these sequences. Only those functions that were directly inferred after the isolation of mutants and from direct interactions with other proteins (as revealed by double hybrid experiments and the like) were selected. We did not consider expression as this was pervasive in almost all the cases. We also obtain information about the putative biological function played for many other NAC proteins from other plants that were described into the gene annotations and/or published articles after running a BlastP using the NCBI non-redundant (nr) protein database. Thus, the information about the biological role played by NAC proteins was completed after running an extensive bibliography searching. S3 Table contains the NAC sequences considered with indication of the plant species, gen names, the Uniprot, GenBank and TAIR accessions, and the list of publications (doi and pubmed URLs) where the biological functions are described. The corresponding amino acid sequences in fasta format are in S4 Table.

Initially, as an approach taken by many other genome-wide analysis studies [17, 25], a multiple sequence alignment was run with the fruit related *Fragaria* NAC proteins along all *Arabidopsis* NAC sequences. This was performed with Clustal Omega that uses a guided tree and a hidden Markov model (HMM) to cluster similar sequences using Gonnet as the default transition matrix and a gap opening and extension penalties of 6 and 1 bits, respectively [37, 38]. We executed this program with the maximum value of 5 iterations, set into configuration. This program cluster sequences based on protein sequence similarity and not in phylogenetical relationships, and this could be crucial when attempting to assign and compare biological functions. The program provides the alignment tree (\*.ph) that was represented using the Fig-Tree v.1.4.3 program (<http://tree.bio.ed.ac.uk/software/figtree/>). Then, the gene functions obtained from the TAIR database and genbank annotations were manually assigned to these represented sequences. To determine whether the NAC subdomains and/or the domains present in the C-terminal region or both regions of the protein are interacting together to drive the biological function of the NAC proteins, we aligned three datasets by separate with the *Arabidopsis* sequences: i) the whole NAC protein gene sequences; ii) the amino terminal regions containing only the NAC multi-domains, and iii) the carboxyl terminal (TR) regions lacking the NAC multi-domains. The amino terminal region harboring the NAC domain was identified after running MEME to recognize the limits of the conserved domains and considering the information provided into the CDD database. Eventually, we run a Clustal Omega

alignment with the entire NAC sequences from any plants whose NAC biological functions were clearly defined.

### Plant material

Strawberry plants (*Fragaria* × *ananassa* Duch. cv. Camarosa, an octoploid cultivar) were grown under field conditions in Huelva (SW of Spain). Plants used for hormone treatments were grown in plant chambers under controlled conditions at 25 °C with a 16/8h light/dark photoperiod. *Fragaria* × *ananassa* fruits were harvested at different developmental stages: small-sized green fruits (G1, 2–3 g), full-sized green fruits (G3, 4–7 g), white fruits (W, 5–8 g), full-ripe red fruits (R, 6–10 g) overripe fruits (OR, 6–10 g) and senescent fruits (SE, 6–10 g). Overripe fruits were harder and dark redder than red ones, meanwhile senescent fruits were softer. Vegetative tissues, such as runners, petals, flowers, and expanding leaves were harvested from the same plants. All collected tissues were immediately frozen in liquid nitrogen and stored at -80 °C until use.

### RNA isolation

Total RNA was isolated and purified from at least three independent pools of strawberry fruits at different growth and ripening stages and from vegetative tissues in accordance with [39]. Total RNA was treated with DNase I (RNase free; Invitrogen) according to the manufacturer's instructions. RNA samples were considered free of DNA when no amplicons corresponding to the analyzed genes were obtained in a standard PCR reaction.

### Auxin treatment

Achenes of two sets of 50 full-sized green (G3) fruits were carefully removed from their receptacles with the help of a scalpel. One set of de-achened G3 fruits was wrapped with 1 mL of lanolin paste that contained 1mM of the synthetic auxin 1-Naphthaleneacetic acid (NAA) and 1% (w/v) of dimethyl sulphoxide. The other set of G3 de-achened fruits (control group) were treated with the same lanolin paste containing dimethyl sulphoxide but lacking NAA. Auxin treatments and sample collection were performed according to [5].

### Nordihydroguaiaretic acid treatment

For ABA-related experiments, green-white fruits were used. A 100 μM of an aqueous solution of 1-Nordihydroguaiaretic acid (NDGA) was injected into the receptacles with a syringe to fully block ABA biosynthesis [40]. NDGA is a strong inhibitor of 9 cis-epoxy-carotenoid dioxygenase, an enzyme required for the biosynthesis of ABA. The ABA content of these samples have been already measured and published [6].

### Water stress (drought) treatment

For the drought stress treatment, we followed established protocols [41]. Fruits from green to white stages were cut along with their pedicels. Half of them were subjected to drought conditions by maintaining the pedicels outdoors under controlled conditions. Pedicels of control fruits not subjected to water stress were immersed in sterile tubes containing Murashige and Skoog liquid medium with 20g/L of sucrose that was renewed every other day [5].

### Microarray analysis and real-time qPCR validation of data

RNA isolated from these experiments has been analyzed through a one-color Agilent microarray analysis using a chip containing more than 32000 different strawberry genes [3]. From



these data, an initial selection of six NAC genes related to the development and ripening of the strawberry fruit was done using a threshold cutoff consisting in a fold change higher than 2 (relative to the green stage), an adjusted p-value  $\leq 0.01$ , and an arbitrary expression intensity  $\geq 700$  units.

Validation of microarray expression data on these six NAC genes was done using a Bio-Rad iCycler Real Time PCR device using SYBR-Green [42]. Primers were designed to obtain an amplified band ranging between 90 and 120 nucleotides with the NCBI Pick Primers WEB service that included a BLAST alignment with the entire strawberry genome to ensure a selective and specific amplification for each of the genes. The amplification efficiency of each qRT-PCR and the melting curves of the final products were also analyzed to test for the existence of a single amplification peak corresponding to unique molecular specie. Primer sequences are shown in S5 Table. cDNA first strand synthesis was done using 2  $\mu$ g of total RNA with the iScript kit (Bio-Rad) following the manufacturer's instructions. Each reaction of the qRT-PCR was carried out by triplicate and their corresponding  $C_t$  values normalized using as reference a 26S–18S interspaced strawberry RNA gene [42, 43, 44, 45]. All these values were used to determine the relative changes of gene expression in the samples as compared with controls in accordance with [46].

## Results and discussion

### Identification, annotation, sequence curation, and chromosomal location of the strawberry NAC family

A total of 117 NAC-containing genes are defined in the annotations of the current published strawberry genome (V 4.0.a1). No new NAC genes were added after running discontinuous BlastP searches against the whole strawberry genome using several randomly chosen *Fragaria* NAC sequences as queries. Since the 4.0.a1 annotation of the *Fragaria vesca* genome still retain certain questionable annotations, we curated these sequences and discarded 5 of them because they lacked either the whole or had a substantially incomplete NAC multi-domain. These discarded sequences showed no parallelism in subdomains composition to other NAC sequences described in more mature genomic assemblies like that of Arabidopsis. S1 Table shows the sequences that were discarded and the reason of that, and S2 Table shows the Pfam pairwise alignment of those discarded gene sequences. Thus, the predicted NAC genes in the strawberry genome were reduced to a total of 112 NAC genes (S6 Table). This number of NAC genes in strawberry agrees with those described in other dicotyledonous plants like tomato (104 genes) [47], Arabidopsis (106 genes) [48], and soybean (101 genes) [49].

The position of the 112 *Fragaria* NAC genes were mapped onto the Ligation Groups (pseudo-chromosomes) FvH1 to FvH7. Then, they were renamed by their order into the chromosomes as FvNACXXX, where XXX is a number ranging between 001 and 112 (Fig 1). LG5 contained the highest number of NAC genes (26) whereas FvH1 and FvH4 only contained 6 sequences. The current version 4.0.a1 of the genome contains 22 unlocated contigs, but none of them contains a NAC gene.

### Domain and motif analysis of the strawberry NAC family

MEME analysis of the 112 strawberry NAC proteins identified 15 subdomains that are in common among these sequences (Fig 2). A detailed amino acid composition of these subdomains is shown in S8 Table. As expected, the N-terminal region contained most of the NAC subdomains share a high degree of conservation. Two main big clades appear with a close evolutionary relationship and uniform subdomain compositions. The first group is mainly composed of

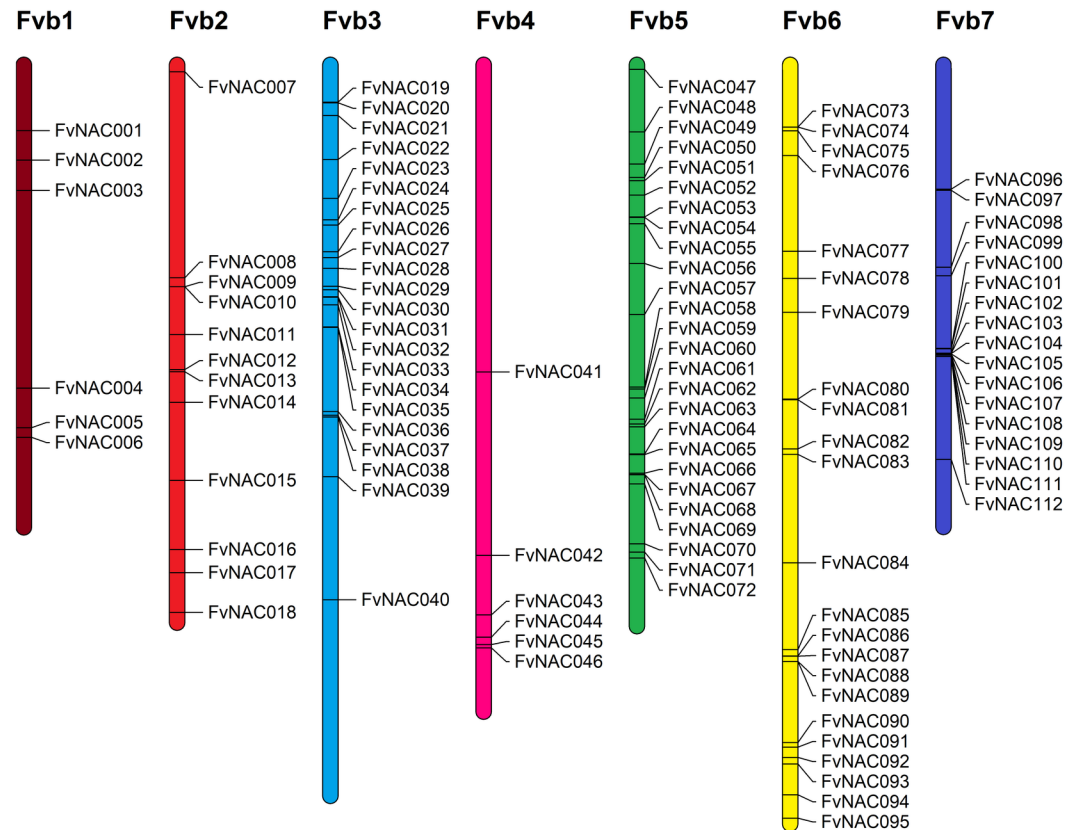

**Fig 1. Ligation Group (FvH) distribution of the curated collection of the strawberry NAC genes.** The putative NAC genes were renamed from *FvNAC001* to *FvNAC112*, based on their placement into the Ligation Groups (FvH) or pseudo-chromosomes. The lengths of the drawings are proportional to the actual pseudo-chromosome lengths. FvH1 has a length of 24.25Mbp nucleotides and this can be used as a reference. *S7 Table* shows the correspondence between the current gene names provided in the *Fragaria* genome database and these newly assigned and ordered names, and the actual length in bases of all pseudo-chromosomes and contigs of the current V4.0.a1 of the genome.

<https://doi.org/10.1371/journal.pone.0196953.g001>

subdomains 3, 5, 1, 3 and 6, respectively. The second group is composed of subdomains 4, 9/15, 8, 13, 14 and 7. Previously, 10 subdomains were described in the tea plant and in potato, 15 in cassava and 20 in tomato, all of them sharing a similar structure, where the conserved domains were found mainly in the N-terminal region of the proteins [47, 50, 51, 52].

A very low number of common domains among the 112 sequences were discovered in the C-terminal regions of the proteins using MEME. This is due to this program does not use the InterPro or Pfam databases to find already known and featured domains. In addition, a domain search analysis done with any of the strawberry NAC sequences using the CDART database clearly shows that this C-terminal region is highly variable and contains many different domains probably accounting for their many distinctive functions. Predicted physiochemical and genetic characteristics of each of the NAC proteins and genes are summarized in *S7 Table*. This was done using the coding sequence annotation included in the database without considering putative variants or isoforms. The predicted protein-coding genes have from 1 to 8 exons with an average of 3 exons, and the proteins ranged from 169 to 715 amino acids in length. The isoelectric point varied from 3.9 to 10.3, giving an indirect indication of the many different cell locations where they could be expressed. These values are like those found in the NAC population of another species.

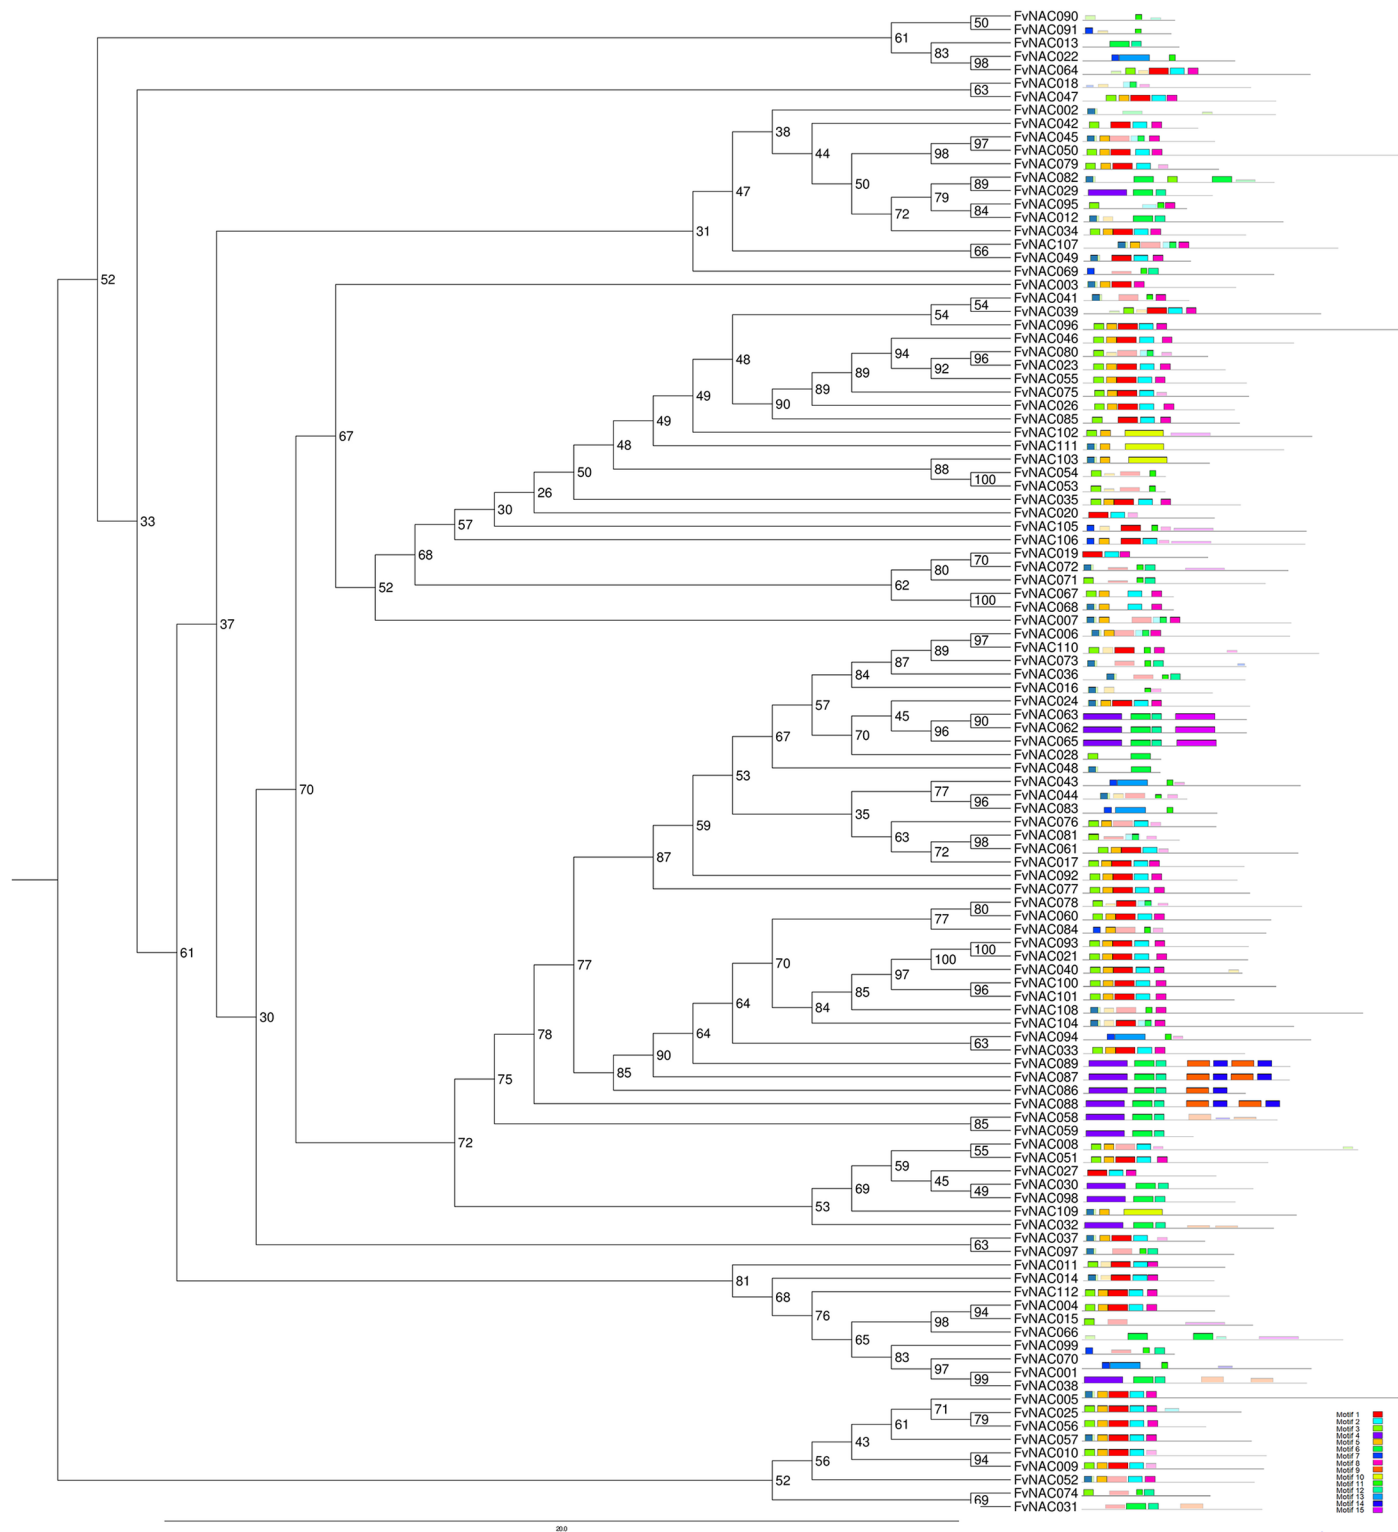

**Fig 2. Phylogenetic relationship and conserved subdomain composition of the 112 NAC strawberry proteins using MEME.** The phylogenetic tree was constructed with the protein sequences with the IQ-tree program using 1000 bootstrappings. Domain analysis was performed with the MEME web service as indicated in Material and methods. A colored box represents each individual subdomain. Grey lines represent sequences that do not share common domains. Detailed amino acid sequence information for each subdomain is provided in [S8 Table](#).

<https://doi.org/10.1371/journal.pone.0196953.g002>



Membrane associated transcription factors have become a main point in research, because of their role in regulating gene expression in plants [10, 25, 26]. The presence of putative transmembrane domains in the strawberry NAC genes was investigated using TMHMM server v. 2.0. Four proteins, FvNAC005, FvNAC008, FvNAC050 and FvNAC107, contained a  $\alpha$ -helical transmembrane domain (designated as NTL) at the C-terminal of the protein (S9 Table). A number of NTLs have been identified in other plant species, including Arabidopsis (18 NTLs), maize (7 NTLs), grape (6 NTLs) and rice (5 NTLs) [10, 27]. NTLs are proposed to play important roles in plant growth and development and in responses to stress [10, 26, 27, 28]. However, none of the NTLs in strawberry are related to the development and ripening of the fruit, so they were not further characterized.

### Expression analysis of NAC genes during the development and ripening of strawberry fruits

According a microarray analysis [3] (GEO database, accession number GSE95300), a total of six *Fragaria x ananassa* NAC genes (*FaNAC006*, *FaNAC021*, *FaNAC022*, *FaNAC035*, *FaNAC042* and *FaNAC092*) are differentially expressed during the development and ripening of the strawberry fruit under the cutoff indicated in Material and methods. S10 Table shows the expression level of these NAC genes in *Fragaria x ananassa* and the statistical significance after running a Bayesian fit and a test of false discovery according to [53] using the R-package limma.

The transcription profiles of these six genes were analyzed and validated at the different development and ripening stages of strawberry fruit receptacles by qRT-PCR. Except for *FaNAC092*, all the fruit-related NAC genes analyzed showed a similar expression pattern, with a relative low level of expression during the development stages (G1 to W), and a clear induction throughout the ripening and senescent stages (R to SE) (Fig 3). *FaNAC092* expression was detected mainly in the senescent stage, showing a substantial expression in this stage respect to

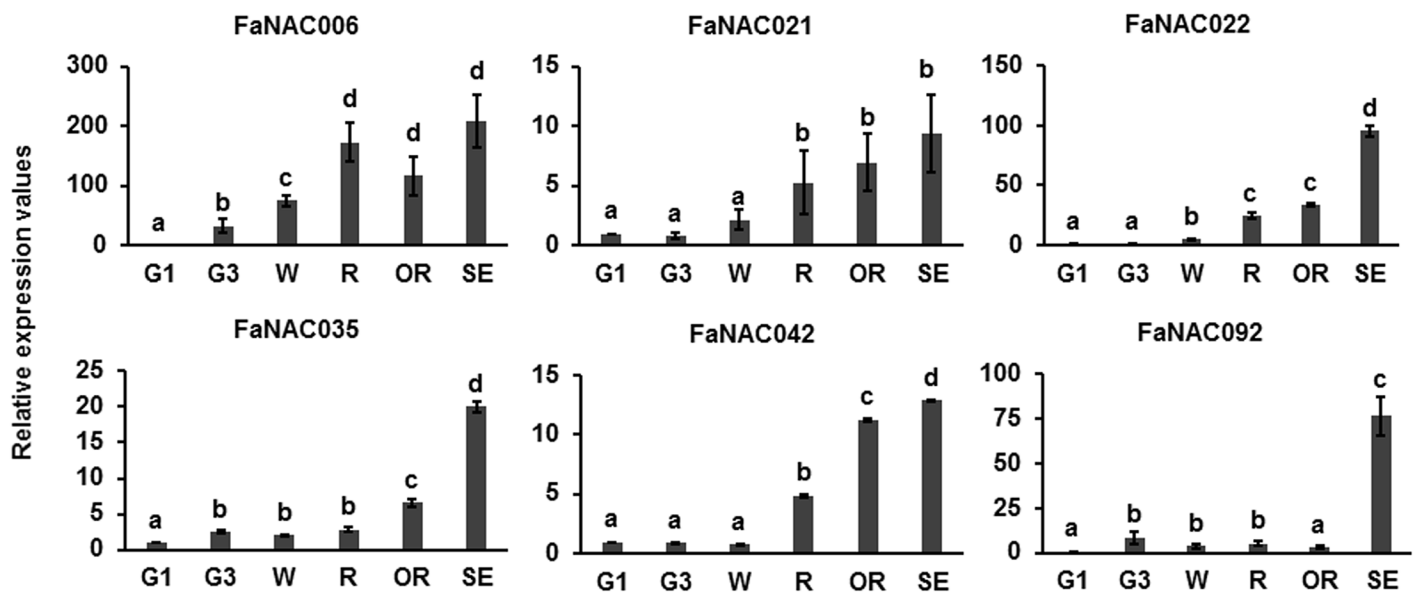

**Fig 3. Developmental expression of the strawberry ripening-related NAC genes in fruit receptacles.** qRT-PCR results were obtained using specific primers for NAC genes. Quantification is based on  $C_t$  values. Relative expression values were calculated in relation to G1 fruits receptacles  $C_t$  value in all cases, which was assigned an arbitrary value equal to unity. G1, green stage 1; G3, green stage 3; W, white stage; R, red stage; OR, overripe stage and SE, senescent stage. Data are a mean of three independent experiments. One-way ANOVA determined statistical significance. Letters indicate significant differences ( $p < 0.05$ , Scheffe post-hoc test).

<https://doi.org/10.1371/journal.pone.0196953.g003>

the R and OR stages. The expression patterns analyzed by qRT-PCR coincided with those of the microarray analyses, thereby validating these results, and were like those of many strawberry ripening-related genes [5, 6, 7, 46, 48, 54, 55, 56], reinforcing that these 6 genes could be involved in these processes. *FaNAC092* expression pattern directly indicates that this gene could play a role in the senescence of the strawberry fruit. Many miRNAs are involved in post-harvest senescence of the strawberry fruit. One of them, miR164, targets three NAC genes: NAC domain transcriptional regulator family protein (gene00971.1-v1.0-hybrid that is FvH4\_3g19410.1 in V4.0.a1), NAC domain containing protein 38 (gene26043.1-v1.0-hybrid that is FvH4\_5g14670.1 in V4.0.a1) and NAC domain containing protein 87 (gene04424.1-v1.0-hybrid that is FvH4\_3g43100.1 in V4.0.a1) [57]. Interestingly, we found that the gene corresponding to the NAC domain containing protein 87 is *FaNAC092*, which suggests that this gene would be involved in regulating fruit senescence independently that the fruit ripens on the plant or after harvesting.

We also analyzed gene expression in the achenes at various stages (Fig 4). Expression of *FaNAC035* and *FaNAC042* increased in achenes throughout all the stages with their highest levels at the ripen stage. A similar expression pattern was found for *FaNAC092*, whose expression was even higher in achenes when compared with those of senescent fruit receptacles. However, *FaNAC006* and *FaNAC021* were expressed in all developmental and ripening stages studied, and no distinctive pattern was observed. *FaNAC022* was expressed in achenes only at an early stage of development (G1 stage).

To determine whether these genes are fruit specific, expression of the NAC genes was analyzed in vegetative tissues such as flowers, petals, runners, and leaves (Fig 5). *FaNAC021*, *FaNAC022*, *FaNAC042* and *FaNAC092* showed elevated levels of expression mainly in petals. *FaNAC021*, *FaNAC042* and *FaNAC092* showed higher expression in petals than in receptacles

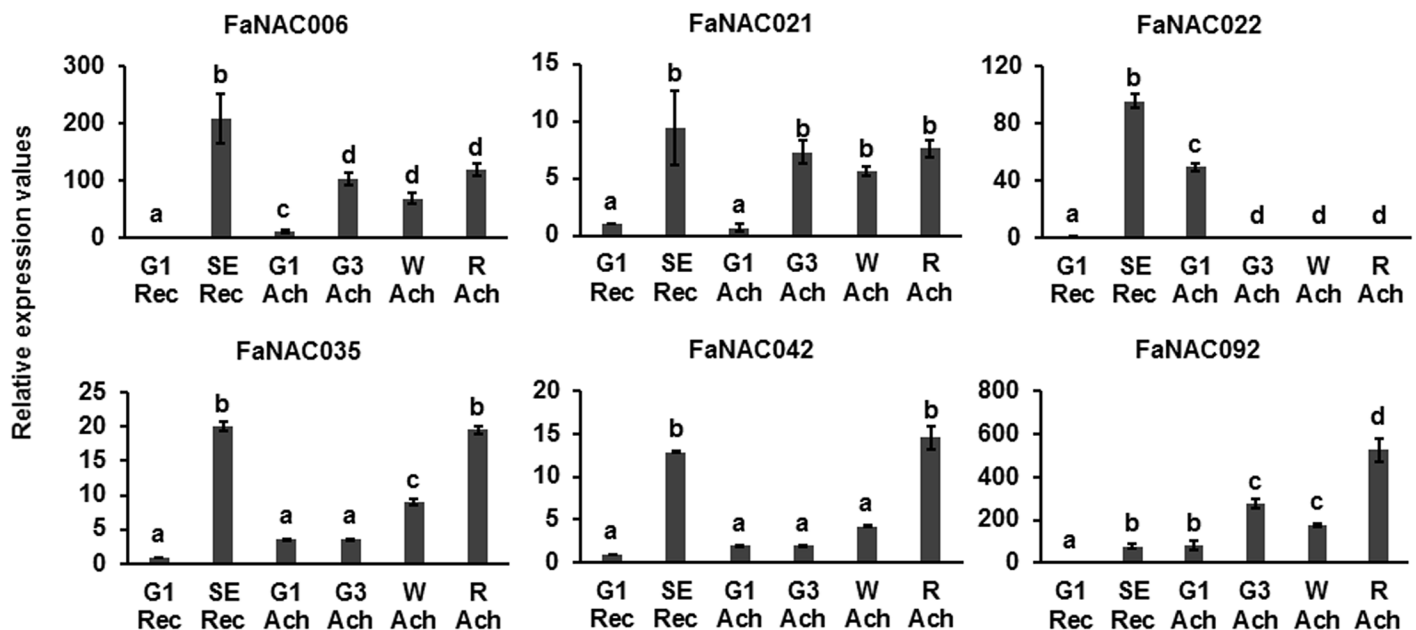

**Fig 4. Developmental expression of the strawberry ripening-related NAC genes in fruit achenes determined by qRT-PCR.** Relative expression values were calculated in relation to the fruit receptacle  $C_1$  at the G1 stage in all cases, which was assigned an arbitrary value equal to unity. G1 Rec: fruit receptacles at the G1 stage; SE Rec: fruit receptacles at the ripen stage; G1 Ach: achenes of G1 fruits; G3 Ach: achenes of G3 fruits; W Ach: achenes of white fruits; and R Ach: achenes of ripen strawberries. Data are a mean of three independent experiments. One-way ANOVA determined statistical significance. Letters indicate significant differences ( $p < 0.05$ , Scheffe post-hoc test).

<https://doi.org/10.1371/journal.pone.0196953.g004>

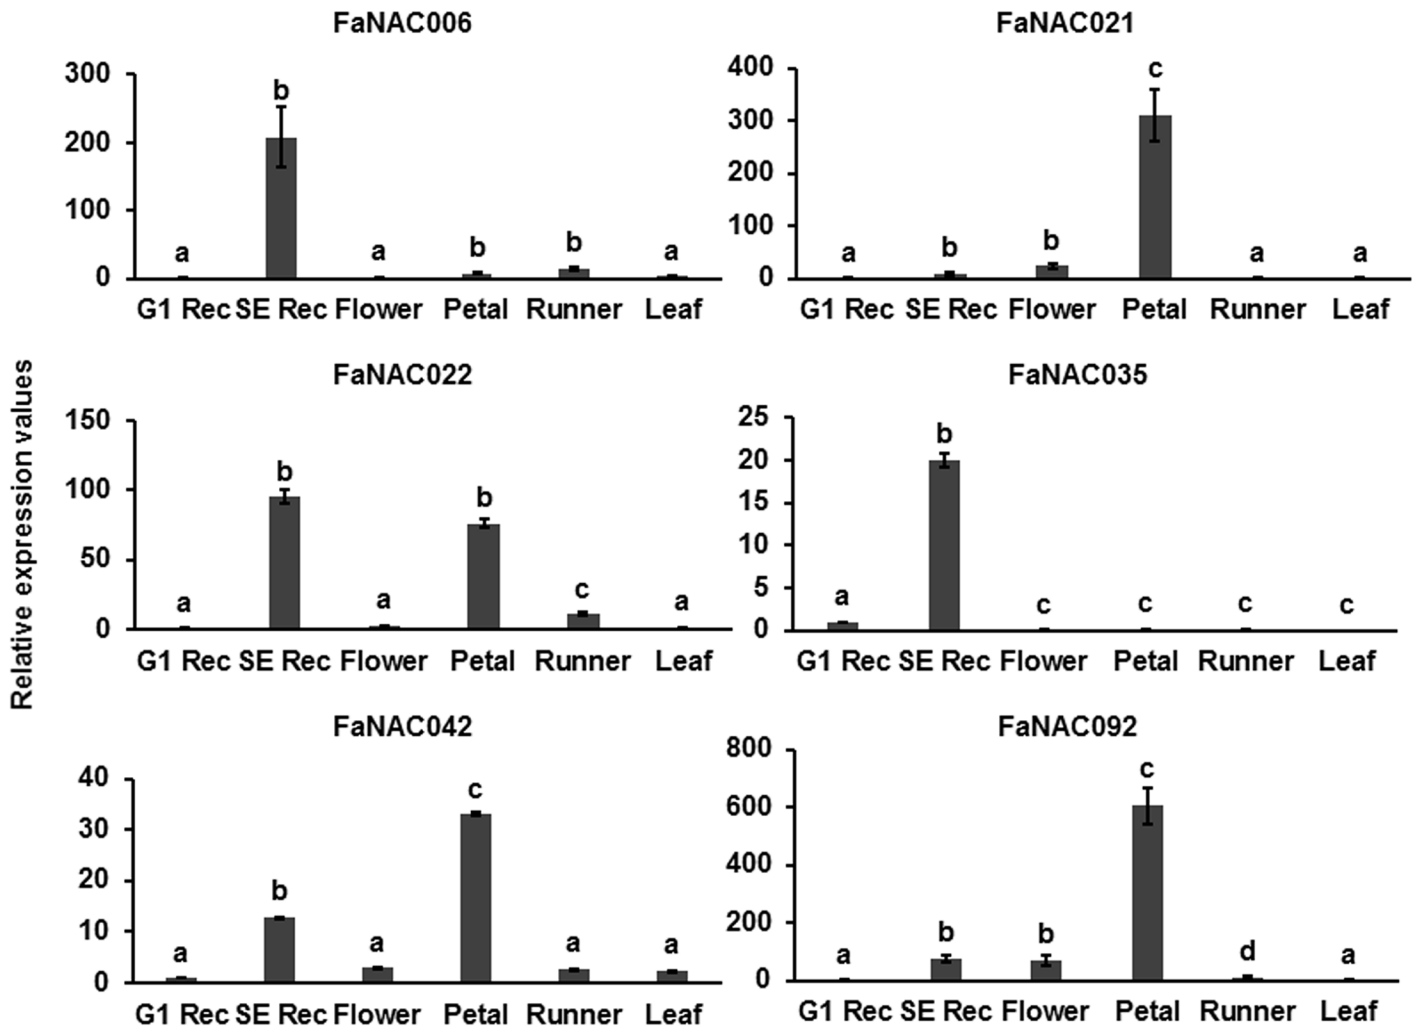

**Fig 5. Tissue specificity expression of the strawberry ripening-related NAC genes determined by qRT-PCR.** Relative expression values were calculated in relation to the fruit receptacle  $C_1$  at the G1 stage in all cases, which was assigned an arbitrary value equal to unity. G1 Rec: fruit receptacles at the G1 stage; SE Rec: fruit receptacles at the senescent stage; vegetative tissue used were flowers, petals, runners, and leaves. Data are a mean of three independent experiments. One-way ANOVA determined statistical significance. Letters indicate significant differences ( $p < 0.05$ , Scheffe post-hoc test).

<https://doi.org/10.1371/journal.pone.0196953.g005>

at the senescent stage. *FaNAC035* was not expressed in any of the vegetative tissues analyzed. Thus, *FaNAC006* and *FaNAC035* are the only NAC genes specifically expressed in fruit, although a very low level of *FaNAC006* expression was also observed in runners. Thus, *FaNAC021*, *FaNAC022*, *FaNAC042* and *FaNAC092* genes could be involved in regulating other processes in the plant in addition to fruit ripening. In fact, many studies have shown that a single NAC gene can function as regulator of different processes [9, 17]. The tomato *SINAC1* is a ripening-related gene expressed in other plant tissues and has a wide influence on fruit ripening. It controls lycopene and ethylene biosynthesis, and indirectly the tomato fruit softening by altering the synthesis of ABA [19]. They could be regulating the same process in different tissues. Two strawberry TFs, R2R3-MYB TF (*FaEOBII*) and *FaDOF2* showed a similar pattern with a high expression in ripen receptacles and petals regulating the production of eugenol, a volatile phenylpropanoid that contributes to the flower and ripe fruit scents [6, 7].

### Hormonal regulation of strawberry ripening-related NAC genes

In strawberry, ABA and auxins are the main hormones involved in the regulation of the fruit. Auxins, produced by immature achenes, stimulate receptacle growth and seem to prevent fruit ripening, whereas ABA is responsible of the ripening process [2, 3]. We analyzed the effect of both hormones on the expression of the fruit-related NAC genes (Figs 6 and 7). To investigate whether the expression of the selected NAC genes was under the control of auxins, we removed the achenes from strawberry G3 stage fruits and measured expression after 5 days (Fig 6). Only *FaNAC006* was induced in de-achened receptacles, and this increase was attenuated by the external application of the synthetic auxin 1-Naphthaleneacetic acid (NAA). This suggests that auxins can repress *FaNAC006*. However, the expression of *FaNAC021*, *FaNAC022* and *FaNAC035* did not change in de-achened receptacles, suggesting that auxins are not regulating their expression. Expression of *FaNAC042* and *FaNA092* diminished in de-achened receptacles in comparison to control indicating that auxins could be inducing them. A recent publication shows that there are some auxin inducible genes expressed in ripen fruits in strawberry [58]. An increase in the expression of both genes however, was not observed when we added the auxin NAA (Fig 6). This means that auxins are not actually regulating their expression, and that the induction of this gene could be more related to a stress caused by wounding. This possibility should be addressed in the future.

Two different approaches were taken to investigate the effect of ABA on the expression of the fruit related NAC genes. First, we examined the expression after injecting to the receptacles

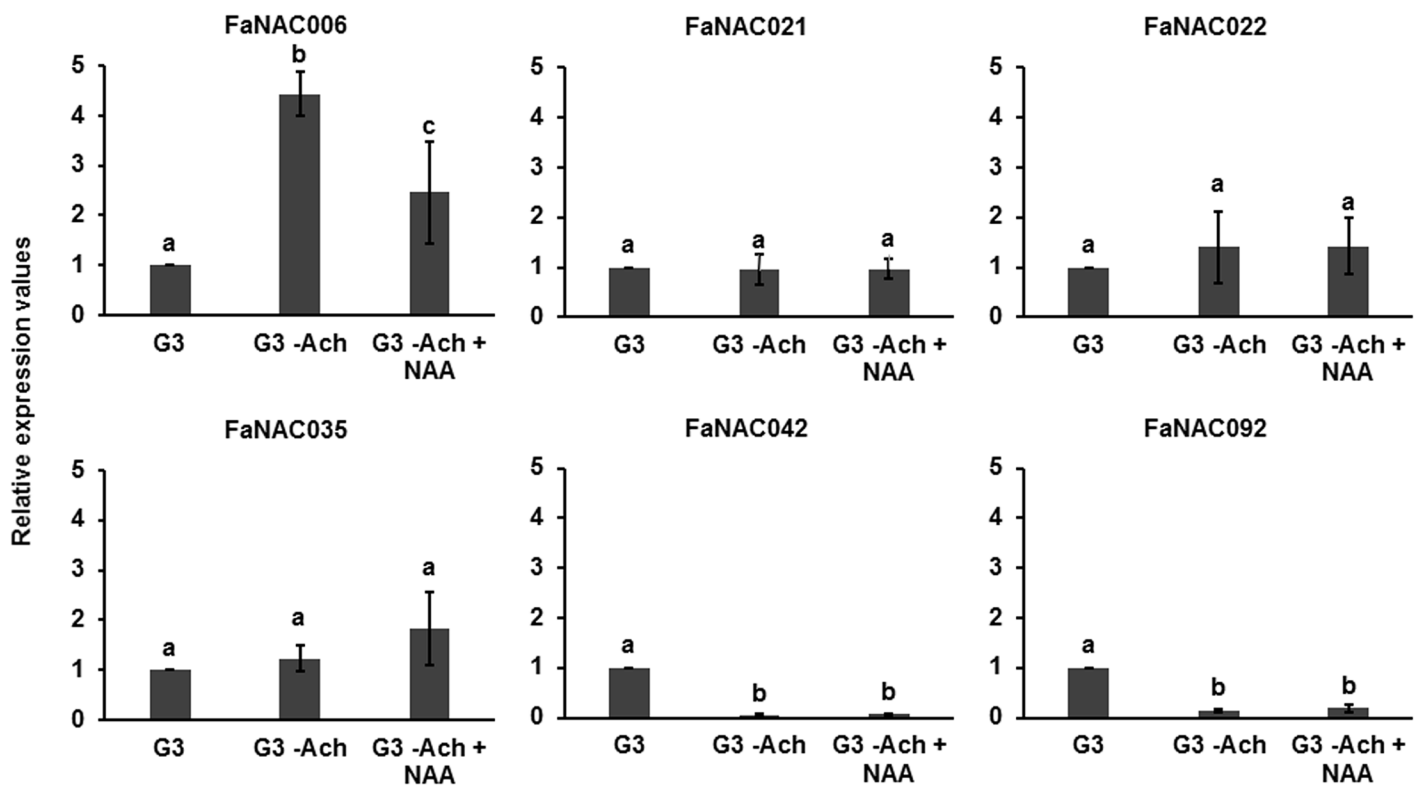

**Fig 6. Auxin regulated expression of the strawberry ripening-related NAC genes determined by qRT-PCR.** After auxin treatment, relative expression values were calculated in relation to the  $C_t$  of control fruits at the G3 stage, which was assigned an arbitrary value equal to the unity. G3: fruit at the G3 stage; G3 -Ach: G3 fruit receptacle without achenes for 5 days; G3 -Ach + NAA: G3 fruit receptacle without achenes plus NAA for 5 days (added at day zero). Data are a mean of three independent experiments. One-way ANOVA determined statistical significance. Letters indicate significant differences ( $p < 0.05$ , Scheffe post-hoc test).

<https://doi.org/10.1371/journal.pone.0196953.g006>

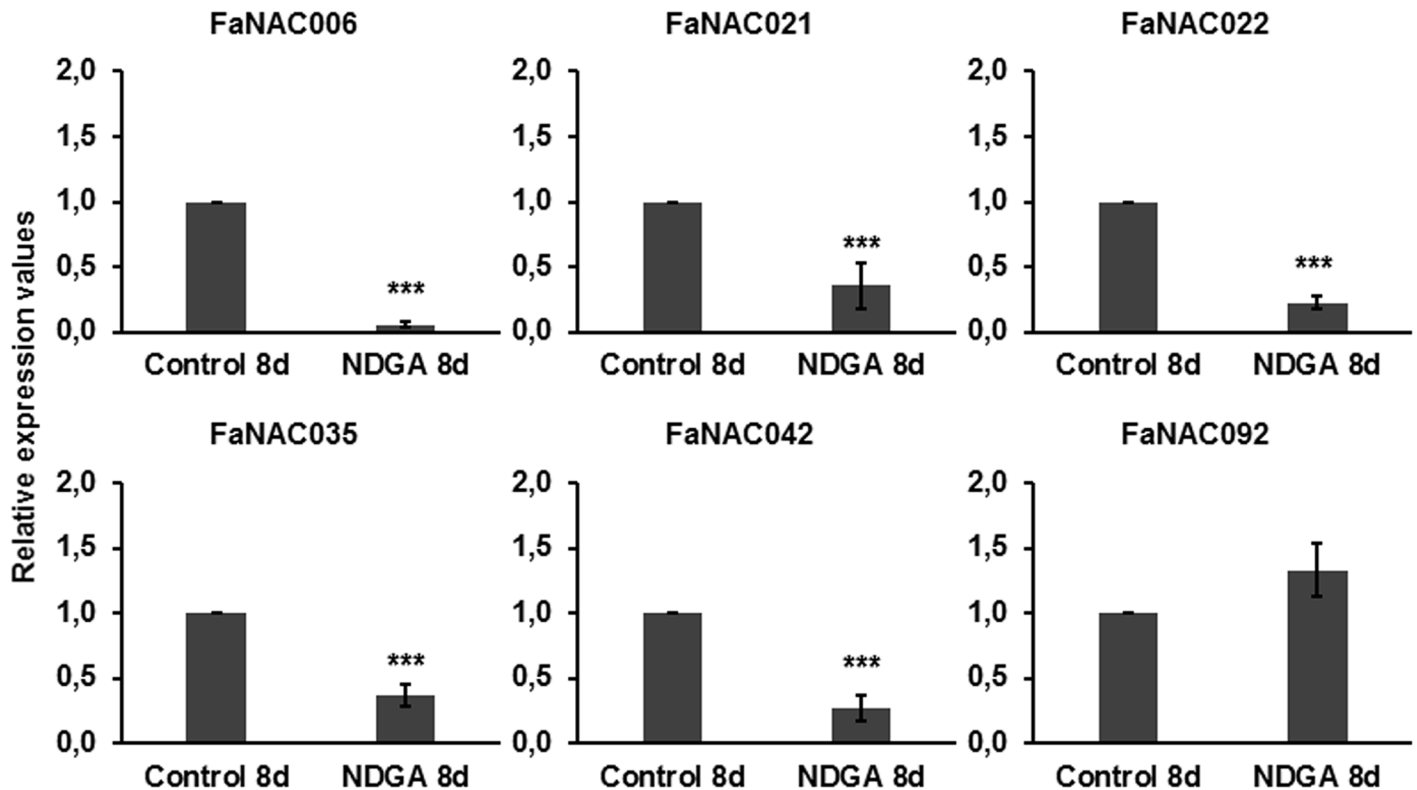

**Fig 7. Effect of the application of the ABA biosynthesis inhibitor NDGA on the expression of the strawberry ripening-related NAC genes determined by qRT-PCR.** After treatment, relative expression values were calculated in relation to untreated control  $C_0$ , which was assigned an arbitrary value equal to the unity. Control: G-W fruit injected with  $H_2O$ ; NDGA: G-W fruits injected with NDGA (100  $\mu M$ ). Both samples were harvested 8 days after beginning of treatment. Mean values  $\pm$  SD of three independent experiments are shown. Student's t-test determined statistical significance with respect to reference sample. (\*\*\*) p-value < 0.001.

<https://doi.org/10.1371/journal.pone.0196953.g007>

1-Nordihydroguaiaretic acid (NDGA), an inhibitor of the biosynthesis of ABA [59]. Second, we subjected receptacles to drought as this treatment increase endogenous ABA biosynthesis and induce premature ripening [5, 60]. The actual ABA content levels in receptacles were determined in these experiments (S11 Table). Fig 7 shows that expression of *FaNAC006*, *FaNAC021*, *FaNAC022*, *FaNAC035* and *FaNAC042* genes substantially diminished after NDGA addition. This clearly indicates that ABA regulates their expression and gives support that these genes are involved in the ripening process. However, *FaNAC092* gene expression was not affected by this treatment.

In contrast, no noticeable changes were observed in the expression of these genes (except for *FaNAC022*) when the fruits were submitted to drought (Fig 8). So, it appears that drought-induced water stress did not activate the expression of *FaNAC006*, *FaNAC021*, *FaNAC035* and *FaNAC042*, even though it was accompanied by a noticeable increase in ABA content (S11 Table). This can be explained if we assume that the severity and the duration of this stress was not enough to induce the expression of these genes. In addition, it suggests that the expression mechanism of these NAC genes in response to ABA and dehydration are more complex than expected, and that some other factors are required. It is worth noting that the experiments of drought stress were done with fruits detached from the plant by maintaining the pedicels into MS medium with sucrose (control fruits) or exposed to the air (drought). Sucrose induces fruit ripening by regulating ABA levels through mechanisms remaining largely unknown [4]. Recent studies of a strawberry ABA-stress-ripening TF, *FaASR*, shown that it works

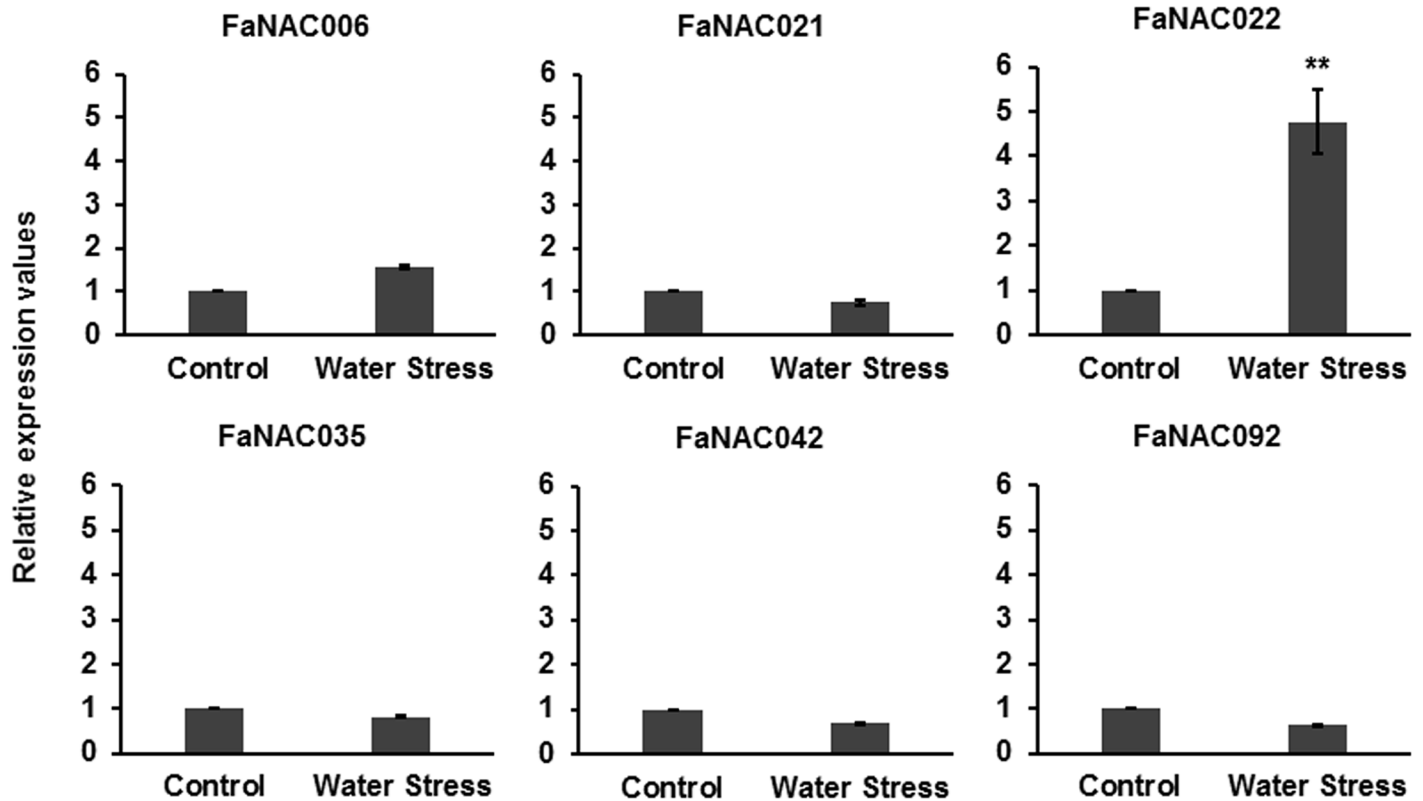

**Fig 8. Effect of drought on the expression of the strawberry ripening-related NAC genes determined by qRT-PCR.** After treatment, relative expression values were calculated in relation to untreated control  $C_0$ , which was assigned an arbitrary value equal to the unity. Control: G-W fruits with their pedicels immersed in MS medium with sucrose; Water Stress: fruits with their pedicels kept in the air. Both samples were harvested 4 days after beginning of treatment. Mean values  $\pm$  SD of three independent experiments are shown. Student's t-test determined statistical significance with respect to reference sample. (\*\*) p-value < 0.001.

<https://doi.org/10.1371/journal.pone.0196953.g008>

downstream of a common transduction pathway for ABA and sucrose signals in fruit ripening, supporting the relationship of ABA and sucrose in the ripening mechanism of strawberry [61]. Also, it has been reported that sucrose-modulated *FaASR* transcriptional levels could be mediated via both an ABA-dependent and ABA-independent pathways [61]. Thus, sucrose can influence the expression of these strawberry NAC genes. Further studies need to be done to probe this.

### Assignment of putative biological functions to the ripening related strawberry NAC proteins

The *Fragaria* annotation included in the public database assigns Arabidopsis orthologous to each of the FvNAC proteins (S7 Table) but does mention neither any putative biological role nor the degree of identity and/or homology between these proteins. An alignment with orthologous Arabidopsis sequences is usually done to assign putative biological functions to new proteins. This approach has revealed functions to NAC proteins in several plants, such those implied in salt stress in *Cucumis melo* [62], drought responses in maize [63], abiotic stresses and stress-related phytohormone treatments in *Brachypodium distachyon* [64] and ethylene-responsive signaling in banana [22]. Other studies have assigned a wider range of functions to the NAC proteins using the same approach [52, 65, 66, 67, 68]. Thus, we run a Clustal Omega alignment with all NAC protein sequences from Arabidopsis along the six developmental and ripening related NAC TFs from strawberry to predict their functions. The proteins functions



obtained from the Arabidopsis TAIR database were annotated at the resulting tree (S1 Fig). We found a small cluster of NAC proteins implied in the biosynthesis and/or development of vascular tissue and cell walls (namely VTCW cluster, blue sequences) (At2G46770, At4G36160, At2G18060, At1G12260, At5G62380 and At1G71930), a minor cluster implied in water balance (namely WB cluster, green sequences) (At4G27410.1, At4G27410.2, and At1G52880), and a minor cluster implied in root cap formation (namely RC cluster, orange sequences) (AT1G79580.1 AT1G79580.2, AT1G79580.2, AT4G10350 and AT1G33280). No clustering was observed for NAC proteins implied in other biological roles such as senescence, flowering, and meristematic development that were dispersedly represented throughout all the tree alignment.

FvNAC021 and FvNAC035 were closely located to the Arabidopsis WB cluster. This suggests that both proteins could be playing a role in water balance and/or stress. In fact, some porins implied in water balance are induced during the ripening [41]. However, the others strawberry FvNAC TFs were not clearly associated to any functional cluster, although FvNAC006 and FvNAC092 were near to the VTCW clade, suggesting a similar role for these proteins. In fact, a degradation of the cell walls that lead to the softening of the fruit takes place at the onset of the ripening of strawberries [2]. In addition, FvNAC022 and FvNAC042, although fell out of the VTCW cluster, are orthologous of AT4G28500.1 and AT5G13180.1 respectively, with similar functions to the VTCW cluster. AT4G28500.1 (SND2) regulates genes involved in secondary cell wall formation in Arabidopsis fiber [69] and AT5G13180.1 is a NAC TF (VNI2) repressing xylem cell formation [70]. Thus, FvNAC022 and FvNAC042 could also be related to the ripening-associated textural changes that involved modifications to the cell-wall components [2].

Since it has been described that the NAC domain itself can drive for the biological function [9, 17, 26], we look for an alternative relationship after aligning only the N-terminal regions that contains this domain. The alignment with only the NAC domains showed the three (VTCW, RC and WB) clades (S2 Fig). This means that these functions could be driven in Arabidopsis by the NAC domain itself and not for the C-terminal portion of the NAC proteins. However, only the WB clade was present when we aligned only the C-terminal region harboring the TR domain of NAC proteins (S3 Fig). This suggests that in the case of the WB clade, there is a cooperation or interaction among the NAC subdomains and the C-terminal portion of the proteins. Nevertheless, most of the 6 FvNAC sequences were always dispersed over any of the phylogenetic trees. Therefore, a putative function could not be inferred with some degree of certainty by using only Arabidopsis sequences.

Thus, the study was extended to include 61 NAC proteins of known function from different plant species (S3 Table). The alignment of the proteins showed that they are grouped into 4 clusters according to their functions (Fig 9). Cluster 1a and 1b contains mostly NAC proteins involved in growth and secondary cell wall development; cluster 2a and 2b contains mainly NAC proteins related to senescence; cluster 3 covers stress-responsive NAC proteins, and cluster 4 includes NAC proteins involved in fruit ripening but also in stress response and growth and development. The six strawberry FvNAC proteins are included in some of these clusters as shown below. FvNAC022 is clustered in group 1a involved in secondary cell wall development. One of the closer proteins was NAC73\_ARATH (SND2, AT4G28500), as in the previous alignment done with Arabidopsis NAC proteins (S1 Fig). SND2 regulates genes involved in cellulose, mannan and xylan biosynthesis, cell wall modifications, and lignin polymerization. Also, it regulates the signal transduction pathway implied in the secondary cell wall development of Arabidopsis fibers [69]. FvNAC042 is included in cluster 1b which contains proteins related to growth and development and is near to NAC83\_ARATH (VNI2) that negatively regulates xylem vessel formation [70]. VNI2 also interact with VND7 (VASCULAR-RELATED

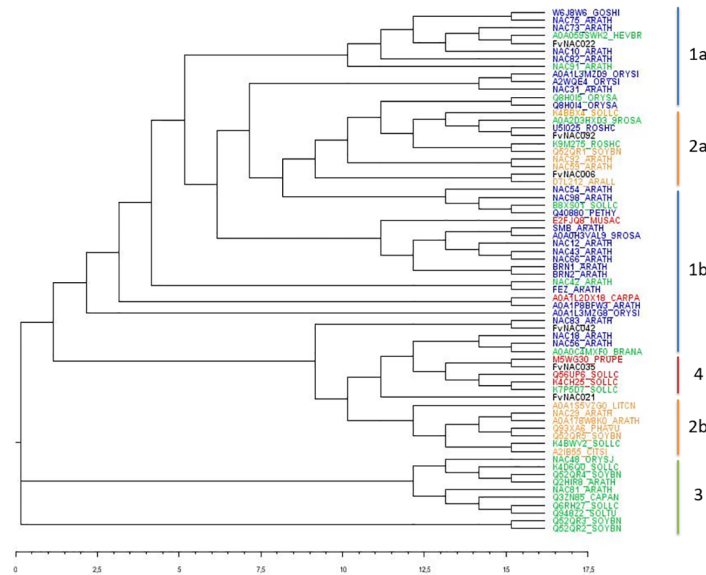

**Fig 9. Clustal Omega cladogram with the alignment of the six strawberry FvNAC proteins and NAC proteins from different plant species with known functions.** Each protein sequence is named by their UniProt code. A direct URL link to these sequences to gain easy access to the UniProt, Genbank and TAIR databases can be found in [S3 Table](#). The full length of the proteins was used for the alignment. Colors indicate protein function: green, stress response; blue, plant growth and development and cell wall metabolism; orange, senescence; red, fruit ripening. The lower scale represents the relative genetic distance. Cluster 1a and 1b contains NAC proteins mainly involved in growth and development, and secondary cell wall development; cluster 2a and 2b contains NAC proteins mainly involved in senescence; cluster 3 contains NAC proteins mainly involved in stress response and cluster 4 includes NAC proteins mainly involved in fruit ripening.

<https://doi.org/10.1371/journal.pone.0196953.g009>

NAC-DOMAIN 7), a master regulator of xylem vessel differentiation [70]. Thus, FvNAC022 and FvNAC042 could have an important contribution in the regulation of the process that alters fruit texture during fruit ripening. Also, FvNAC022 was very close to A0A059SW-K2\_HEVBR (*HbNAC1*), which is involved in dehydration-induced laticifer differentiation in *Hevea brasiliensis*. The overexpression of *HbNAC1* enhances drought tolerance [71]. In accordance, only *FaNAC022* expression was seen when the strawberry fruits were submitted to drought (Fig 8). Thus, FvNAC022 could also be involved in stress response. Both FvNAC021 and Fv0NAC35 are included in the fruit ripening cluster (cluster 4) but FvNAC035 was more like the ripening related proteins. *FaNAC035* was the only strawberry NAC gene specifically expressed in fruit (Fig 5). Fv0NAC35 was near to M5WG30\_PRUPE (*PpNAC1*). *PpNAC1* is a TF expressed in the late developmental stages of peach fruit and is involved in anthocyanin biosynthesis [23]. *PpNAC1* forms a heterodimer with another NAC TF (BL), and activates the transcription of *PpMYB10*, leading to the anthocyanin pigmentation in tobacco [23]. Tomato NAC TFs with important roles in ethylene biosynthesis, reception and signaling of fruit ripening were found in cluster 4. Thus, FvNAC021 and Fv0NAC35 could be regulating important specific aspects of strawberry fruit ripening. FvNAC006 and FvNAC092 were included in cluster 1a with more heterogeneous functions, although most of the proteins were related to senescence. FvNAC006 is near to D7L212\_ARALL (*AtANAC046*), which is a positive regulator of Arabidopsis leaf senescence controlling the expression of chlorophyll catabolic and senescence-associated genes [72]. Recently, it has reported that manipulation of the senescence-associated NAC gene *SIORE1S02* (UniProtKB—K4BBX4) improves tomato fruit yield [73]. Silenced transgenic plants showed delayed senescence and enhanced carbon assimilation that, in turn, increased the number of fruits. Moreover, fruits enhanced also their total soluble solid

content and their nutraceutical composition [73]. K4BBX4\_SOLLC is very close to FvNAC092 but, it was also near to U5I025\_ROSHC (RhNAC100) that has been found to act as a negative regulator of cell expansion in rose petals [74]. FvNAC092 and RhNAC100 showed the highest identity in the alignment of all NAC proteins (90% and 94% of identity and homology, respectively, [S10 Table](#)). The expression studies of tissue specificity of the selected strawberry ripening-related NAC genes showed that *FaNAC092* was also highly expressed in petal in addition to those in receptacles at the senescent SE stage ([Fig 5](#)). This suggests that FvNAC092 could be involved in regulating cell expansion of strawberry petals, and in the fruit at the late stages of ripening. It has reported that cell expansion continued in receptacles for at least 28 d after anthesis [75]. The identity data for the six strawberry NAC proteins sequences when were compared to those of the closest related homologs in the cladogram are shown in [S12 Table](#).

## Conclusions

A total of 112 *FaNAC* genes have been found in the current version of the annotated strawberry genome. The genomic features and the physiochemical properties of the corresponding proteins are shown. Six of these genes that are related to the development and ripening of the strawberry were selected after a microarray analysis that included all the genes present in the current *Fragaria* genome. Their expression patterns during this process and under different hormonal and stress conditions by qRT-PCR were studied. From these results and by means of the clustering of these proteins along Arabidopsis and many other plant NAC protein sequences with known functions, we can infer putative functions to the six development and ripening strawberry *FaNAC* proteins: *FaNAC022* and *FaNAC042* could be involved in the regulation of the growth and development of the fruit, mainly related to the vascular tissue and in secondary cell wall development, and hence into fruit texture and firmness. *FaNAC006* and *FaNAC092* are likely to be regulating process related to fruit senescence, although both could also be involved in fruit development; and *FaNAC021* and, especially *FaNAC035* could be implied in specific process during the ripening of the fruit. Our study allows to determine these *FaNAC* genes as good candidates for further studies to establish their specific function in the development and ripening of the strawberry fruit and their potential utilization to improve strawberry quality by biotechnical approaches.

## Supporting information

**S1 Table. *Fragaria* NAC sequences discarded after a domain analysis done with MEME and Pfam program.** Sequences eliminated from the *Fragaria* NAC protein collection. The name of the eliminated sequence is the name given to the gene found in the original strawberry genome public database (*Fragaria vesca* Genome v4.0.a1).

(DOCX)

**S2 Table. Analysis of discarded sequences for Pfam matches.** Table shows the aligned sequences that were discarded because they were lacking and/or showed low identity in the NAC/NAM domain.

(DOCX)

**S3 Table. NAC proteins with known functions with indication of the plant species, gene names, the Uniprot, Genbank and Arabidopsis TAIR accessions, and the list of publications.**

(XLSX)

**S4 Table. Amino acid sequences in fasta format of NAC proteins of known functions.**

(DOCX)

**S5 Table. Primers used for the qRT-PCR quantitation of the six NAC genes related to the development and ripening of *Fragaria x ananassa*.**

(DOCX)

**S6 Table. Amino acid sequences in fasta format of strawberry NAC proteins.**

(DOCX)

**S7 Table. Physicochemical features and denomination of the *Fragaria* NAC family.**

(XLSX)

**S8 Table. Amino acid consensus sequences found in the motifs discovered by the MEME program.**

(DOCX)

**S9 Table. Putative membrane-bound domains present in strawberry NACs.**

(XLSX)

**S10 Table. Microarray data from transcriptomic comparison between red and green fruits for FvNAC genes.** Magnitudes of relative induction to ripe receptacles (fold change), adjusted p.value ( $\leq 0.01$ ) and the total signal intensity for each feature on microarrays platform in arbitrary units of intensity (a.u.i.) are given. Gene ID as reported in *Fragaria vesca* Genome Database (<http://www.strawberrygenome.org/>).

(XLSX)

**S11 Table. ABA content in fruit.** Data is extracted from HPLC-MS quantitative analysis published elsewhere [5].

(XLSX)

**S12 Table. Identity data for the six strawberry NAC proteins sequences compared to those of the closest related homologs in the cladogram by using Needleman-Wunsch alignment (<https://blast.ncbi.nlm.nih.gov/Blast.cgi>).**

(XLSX)

**S1 Fig. Clustal Omega phylogenetic alignment of whole Arabidopsis NAC proteins along the ripening-related strawberry NAC proteins.** Red: *Fragaria vesca* sequences; Blue: Arabidopsis genes related to the biosynthesis and/or development of vascular tissue and cell-walls; Green: Arabidopsis genes related to water balance and/or stress. Biological functions are defined at the beginning or the end of the protein name: S: senescence; D: defense; M: Meristem formation; Fv: Flavonoid biosynthesis; H: Response to hydrogen peroxide; R: Root cap; C: Cell division; Ce: Cell size; Pol: Pollen development; A: ABA response; F: Flowering; E: Epistasis; P: Proline; RF: Flowering repression; V: biosynthesis and/or development of vascular tissue and cell-walls; Dh: Fruit Dehiscence; An: Anthocyanin related; Wb: water balance and/or stress; L: Leaf formation; Em: Embryo development; G: DNA damage. In *S4* and *S7* Tables, we have included live URL links that provides the correspondence between Arabidopsis protein names and their corresponding UniProt accession.

(TIF)

**S2 Fig. Clustal Omega phylogenetic alignment of the N-terminal regions of the Arabidopsis NAC proteins along the ripening-related strawberry NAC proteins including the NAC subdomains.** Red: *Fragaria vesca* sequences; Blue: Arabidopsis genes related to the biosynthesis and/or development of vascular tissue and cell-walls; Green: Arabidopsis genes related to water balance and/or stress. Biological functions are defined at the beginning or the end of the protein name: S: senescence; D: defense; M: Meristem formation; Fv: Flavonoid biosynthesis;

H: Response to hydrogen peroxide; R: Root cap; C: Cell division; Ce: Cell size; Pol: Pollen development; A: ABA response; F: Flowering; E: Epistasis; P: Proline; RF: Flowering repression; V: biosynthesis and/or development of vascular tissue and cell-walls; Dh: Fruit Dehiscence; An: Anthocyanin related; W: water balance and/or stress; L: Leaf formation; Em: Embryo development; G: DNA damage. In [S4](#) and [S7](#) Tables, we have included live URL links that provides the correspondence between Arabidopsis protein names and their corresponding UniProt accession.

(TIF)

**S3 Fig. Clustal Omega phylogenetic alignment of the C-terminal regions of the Arabidopsis NAC proteins along the ripening-related strawberry NAC proteins excluding the NAC subdomains.** Alignment of only the C-terminal portion of the NAC proteins containing the TR (transcriptional regulatory). Red: *Fragaria vesca* sequences; Blue: Arabidopsis genes related to the biosynthesis and/or development of vascular tissue and cell-walls; Green: Arabidopsis genes related to water balance and/or stress. Biological functions are defined at the beginning or the end of the protein name: S: senescence; D: defense; M: Meristem formation; Fv: Flavonoid biosynthesis; H: Response to hydrogen peroxide; R: Root cap; C: Cell division; Ce: Cell size; Pol: Pollen development; A: ABA response; F: Flowering; E: Epistasis; P: Proline; RF: Flowering repression; V: biosynthesis and/or development of vascular tissue and cell-walls; Dh: Fruit Dehiscence; An: Anthocyanin related; W: water balance and/or stress; L: Leaf formation; Em: Embryo development; G: DNA damage. In [S4](#) and [S7](#) Tables, we have included live URL links that provides the correspondence between Arabidopsis protein names and their corresponding UniProt accession.

(TIF)

## Author Contributions

**Conceptualization:** Antonio Rodríguez-Franco.

**Data curation:** Enriqueta Moyano, Antonio Rodríguez-Franco.

**Formal analysis:** Rosario Blanco-Portales, Francisco Javier Molina-Hidalgo.

**Funding acquisition:** Juan Muñoz-Blanco, Antonio Rodríguez-Franco.

**Investigation:** Félix J. Martínez-Rivas, Rosario Blanco-Portales, Francisco Javier Molina-Hidalgo, Pablo Ric-Varas, Antonio J. Matas-Arroyo, José Luis Caballero, Juan Muñoz-Blanco, Antonio Rodríguez-Franco.

**Supervision:** Enriqueta Moyano, Antonio Rodríguez-Franco.

**Writing – original draft:** Enriqueta Moyano, Antonio Rodríguez-Franco.

**Writing – review & editing:** Enriqueta Moyano, Antonio Rodríguez-Franco.

## References

1. Giampieri F, Tulipani S, Alvarez-Suarez JM, Quiles JL, Mezzetti B, Battino M. The strawberry: composition, nutritional quality, and impact on human health. *Nutrition*. 2012; 28: 9–19. <https://doi.org/10.1016/j.nut.2011.08.009> PMID: 22153122
2. Cherian S, Figueroa CR, Nair H. 'Movers and shakers' in the regulation of fruit ripening: a cross-dissection of climacteric versus non-climacteric fruit. *J Exp Bot*. 2014; 65: 4705–4722. <https://doi.org/10.1093/jxb/eru280> PMID: 24994760
3. Medina-Puche L, Blanco-Portales R, Molina-Hidalgo FJ, Cumplido-Laso G, García-Caparrós N, Moyano-Cañete E, et al. Extensive transcriptomic studies on the roles played by abscisic acid and

- auxins in the development and ripening of strawberry fruits. *Funct Integr Genomics*. 2016; 16: 671–692. <https://doi.org/10.1007/s10142-016-0510-3> PMID: 27614432
4. Jia H, Wang Y, Sun M, Li B, Han Y, Zhao Y, et al. Sucrose functions as a signal involved in the regulation of strawberry fruit development and ripening. *New Phytol*. 2013; 198: 453–465. <https://doi.org/10.1111/nph.12176> PMID: 23425297
  5. Medina-Puche L, Cumplido-Laso G, Amil-Ruiz F, Hoffmann T, Ring L, Rodríguez-Franco A, et al. MYB10 plays a major role in the regulation of flavonoid/phenylpropanoid metabolism during ripening of *Fragaria × ananassa* fruits. *J Exp Bot*. 2014; 65: 401–417. <https://doi.org/10.1093/jxb/ert377> PMID: 24277278
  6. Medina-Puche L, Molina-Hidalgo FJ, Boersma M, Schuurink RC, López-Vidriero I, Solano R, et al. An R2R3-MYB Transcription factor regulates eugenol production in ripe strawberry fruit receptacles. *Plant Physiol*. 2015; 168: 598–614. <https://doi.org/10.1104/pp.114.252908> PMID: 25931522
  7. Molina-Hidalgo FJ, Medina-Puche L, Cañete-Gómez C, Franco-Zorrilla JM, López-Vidriero I, Solano R, C et al. The fruit-specific transcription factor FaDOF2 regulates the production of eugenol in ripe fruit receptacles. *J Exp Bot*. 2017; 68: 4529–4543. <https://doi.org/10.1093/jxb/erx257> PMID: 28981772
  8. Carvalho RF, Carvalho SD, O'Grady K, Folta KM. Agroinfiltration of strawberry fruit—A powerful transient expression system for gene validation. *Curr Plant Biol*. 2016; 6: 19–37. <https://doi.org/10.1016/j.cpb.2016.09.002>
  9. Shao H, Wang H, Tang X. NAC transcription factors in plant multiple abiotic stress responses: progress and prospects. *Front Plant Sci*. 2015; 6: 902. <https://doi.org/10.3389/fpls.2015.00902> PMID: 26579152
  10. Kim HJ, Nam HG, Lim PO. Regulatory network of NAC transcription factors in leaf senescence. *Curr Opin Plant Biol*. 2016; 33: 48–56. <https://doi.org/10.1016/j.pbi.2016.06.002> PMID: 27314623
  11. Sablowski RWM, Meyerowitz EM. A homolog of *NO APICAL MERISTEM* is an immediate target of the floral homeotic genes *APETALA3/PISTILLATA*. *Cell*. 1998; 92: 93–103. [https://doi.org/10.1016/S0092-8674\(00\)80902-2](https://doi.org/10.1016/S0092-8674(00)80902-2) PMID: 9489703
  12. He X-J, Mu R-L, Cao W-H, Zhang Z-G, Zhang J-S, Chen S-Y. AtNAC2, a transcription factor downstream of ethylene and auxin signaling pathways, is involved in salt stress response and lateral root development. *Plant J*. 2005; 44: 903–916. <https://doi.org/10.1111/j.1365-313X.2005.02575.x> PMID: 16359384
  13. Guo Y, Gan S. AtNAP, a NAC family transcription factor, has an important role in leaf senescence. 2006; 46: 601–612. <https://doi.org/10.1111/j.1365-313X.2006.02723.x> PMID: 16640597
  14. Mao C, Ding W, Wu Y, Yu J, He X, Shou H, Wu P. Overexpression of a NAC-domain protein promotes shoot branching in rice. *New Phytol*. 2007; 176: 288–98. <https://doi.org/10.1111/j.1469-8137.2007.02177.x> PMID: 17888111
  15. Aslam M, Grover A, Sinha VB, Fakher B, Pande V, Yadav PV, et al. Isolation and characterization of cold responsive NAC gene from *Lepidium latifolium*. *Mol Biol Rep*. 2012; 39: 9629–9638. <https://doi.org/10.1007/s11033-012-1828-0> PMID: 22733493
  16. Wang X, Basnayake BM, Zhang H, Li G, Li W, Virk N, et al. The *Arabidopsis* ATAF1, a NAC transcription factor, is a negative regulator of defense responses against necrotrophic fungal and bacterial pathogens. *Mol Plant Microbe Interact*. 2009; 22: 1227–1238. <https://doi.org/10.1094/MPMI-22-10-1227> PMID: 19737096
  17. Nuruzzaman M, Sharoni AM, Kikuchi S. Roles of NAC transcription factors in the regulation of biotic and abiotic stress responses in plants. *Front Microbiol*. 2013; 4: 248. <https://doi.org/10.3389/fmicb.2013.00248> PMID: 24058359
  18. Giovannoni J. J. Genetic regulation of fruit development and ripening. *Plant Cell*. 2004; 16: S170–S180. <https://doi.org/10.1105/tpc.019158> PMID: 15010516
  19. Ma N, Feng H, Meng X, Li D, Yang D, Wu C, Meng Q. Overexpression of tomato *SINAC1* transcription factor alters fruit pigmentation and softening. *BMC Plant Biol*. 2014; 14: 351–365. <https://doi.org/10.1186/s12870-014-0351-y> PMID: 25491370
  20. Zhu M, Chen G, Zhou S, Tu Y, Wang Y, Dong T, Hu Z. A new tomato NAC (NAM/ATAF1/2/CUC2) transcription factor, SINAC4, functions as a positive regulator of fruit ripening and carotenoid accumulation. *Plant Cell Physiol*. 2014; 55: 119–35. <https://doi.org/10.1093/pcp/pct162> PMID: 24265273
  21. Meng C, Yang D, Ma X, Zhao W, Liang X, Ma N, Meng Q. Suppression of tomato *SINAC1* transcription factor delays fruit ripening. *J Plant Physiol*. 2016; 193: 88–96. <https://doi.org/10.1016/j.jplph.2016.01.014> PMID: 26962710
  22. Shan W, Kuang JF, Chen L, Xie H, Peng HH, Xiao YY, et al. Molecular characterization of banana NAC transcription factors and their interactions with ethylene signalling component EIL during fruit ripening. *J Exp Bot*. 2012; 63: 5171–87. <https://doi.org/10.1093/jxb/ers178> PMID: 22888129



23. Zhou H, Lin-Wang K, Wang H, Gu C, Dare AP, Espley RV, et al. Molecular genetics of blood-fleshed peach reveals activation of anthocyanin biosynthesis by NAC transcription factors. *Plant J.* 2015; 82: 105–21. <https://doi.org/10.1111/tpj.12792> PMID: 25688923
24. Jiang G, Yan H, Wu F, Zhang D, Zeng W, Qu H, et al. Litchi fruit LcNAC1 is a target of LcMYC2 and regulator of fruit senescence through its interaction with LcWRKY1. *Plant Cell Physiol.* 2017; 58: 1075–1089. <https://doi.org/10.1093/pcp/pcx054> PMID: 28419348
25. Ooka H, Satoh K, Doi K, Nagata T, Otomo Y, Murakami K, et al. Comprehensive analysis of NAC family genes in *Oryza sativa* and *Arabidopsis thaliana*. *DNA Res.* 2003; 10: 239–247. <https://doi.org/10.1093/dnares/10.6.239> PMID: 15029955
26. Puranik S, Sahu PP, Srivastava PS Prasad M. NAC proteins: regulation and role in stress tolerance. *Trends Plant Sci.* 2012; 17:369–381 <https://doi.org/10.1016/j.tplants.2012.02.004> PMID: 22445067
27. Kim S-G, Lee S, Ryu J, Park C-M. Probing protein structural requirements for activation of membrane-bound NAC transcription factors in *Arabidopsis* and rice. *Plant Sci.* 2010; 178: 239–244. <https://doi.org/10.1016/j.plantsci.2009.12.007>
28. Liang M, Li H, Zhou F, Li H, Liu J, Hao Y, et al. Subcellular Distribution of NTL Transcription Factors in *Arabidopsis thaliana*. *Traffic.* 2015; 16: 1062–1074. <https://doi.org/10.1111/tra.12311> PMID: 26201836
29. Wei W, Hu Y, Han YT, Zhang K, Zhao FL, Feng JY. The WRKY transcription factors in the diploid woodland strawberry *Fragaria vesca*: Identification and expression analysis under biotic and abiotic stresses. *Plant Physiol Biochem.* 2016; 105: 129–144. <https://doi.org/10.1016/j.plaphy.2016.04.014> PMID: 27105420
30. Bombarely A, Merchante C, Csukasi F, Cruz-Rus E, Caballero JL, Medina-Escobar N, et al. Generation and analysis of ESTs from strawberry (*Fragaria* × *ananassa*) fruits and evaluation of their utility in genetic and molecular studies. *BMC Genomics.* 2010; 11: 503–520. <https://doi.org/10.1186/1471-2164-11-503> PMID: 20849591
31. Voorrips RE. MapChart: Software for the graphical presentation of linkage maps and QTLs. *J Hered.* 2002; 93: 77–78. <https://doi.org/10.1093/jhered/93.1.77> PMID: 12011185
32. Bailey TL, Boden M, Buske FA, Frith M, Grant CE, Clementi L, et al. MEME SUITE: tools for motif discovery and searching. *Nucleic Acids Res.* 2009; 37: 202–208 <https://doi.org/10.1093/nar/gkp335> PMID: 19458158
33. Trifinopoulos J, Nguyen L-T, von Haesler A, Quang MB. W-IQ-TREE: a fast online phylogenetic tool for maximum likelihood analysis. *Nucleic Acids Res* 2016; 44(W1): W232–W235. <https://doi.org/10.1093/nar/gkw256> PMID: 27084950
34. Jones P, Binns D, Chang HY, Fraser M, Li W, McAnulla C, et al. InterProScan 5: genome-scale protein function classification. *Bioinformatics.* 2014; 30: 1236–1240. <https://doi.org/10.1093/bioinformatics/btu031> PMID: 24451626
35. Geer LY, Domrachev M, Lipman DJ, Bryant SH. CDART: protein homology by domain architecture. *Genome Res.* 2002; 12: 1619–23. <https://doi.org/10.1101/gr.278202> PMID: 12368255
36. Sonnhammer EL, von Heijne G, Krogh A. A hidden Markov model for predicting transmembrane helices in protein sequences. *Proc Int Conf Intell Syst Mol Biol.* 1998; 6: 175–82. PMID: 9783223
37. McWilliam H, Li W, Uludag M, Squizzato S, Park YM, Buso N, et al. Analysis Tool Web Services from the EMBL-EBI. *Nucleic Acids Res.* 2013; 41: W597–600 <https://doi.org/10.1093/nar/gkt376> PMID: 23671338
38. Söding J. Protein homology detection by HMM–HMM comparison. *Bioinformatics.* 2005; 21: 951–960. <https://doi.org/10.1093/bioinformatics/bti125> PMID: 15531603
39. Asif M, Dhawan P, Nath P. A simple procedure for the isolation of high quality RNA from ripening banana fruit. *Plant Mol Biol Rep.* 2000; 18: 109–115 <https://doi.org/10.1007/BF02824018>
40. Creelman RA, Bell E, Mullet JE. Involvement of a lipoxygenase-like enzyme in abscisic acid biosynthesis. *Plant Physiol.* 1992; 99: 1258–1260. <https://doi.org/10.1104/pp.99.3.1258> PMID: 16668998
41. Molina-Hidalgo FJ, Medina-Puche L, Gelis S, Ramos J, Sabir F, Soveral G, et al. Functional characterization of *FaNIP1;1* gene, a ripening-related and receptacle-specific aquaporin in strawberry fruit. *Plant Sci.* 2015; 238: 198–211. <https://doi.org/10.1016/j.plantsci.2015.06.013> PMID: 26259188
42. Raab T, López-Ráez JA, Klein D, Caballero JL, Moyano E, Schwab W, et al. *FaQR*, required for the biosynthesis of the strawberry flavor compound 4-hydroxy-2,5-dimethyl-3(2H)-furanone, encodes an enone oxidoreductase. *Plant Cell.* 2006; 18: 1023–1037 <https://doi.org/10.1105/tpc.105.039784> PMID: 16517758
43. Encinas-Villarejo S, Maldonado AM, Amil-Ruiz F, de los Santos B, Romero F, Pliego-Alfaro F, et al. Evidence for a positive regulatory role of strawberry (*Fragaria* × *ananassa*) *FaWRKY1* and *Arabidopsis AtWRKY75* proteins in resistance. *J Exp Bot.* 2009; 60: 3043–3065. <https://doi.org/10.1093/jxb/erp152> PMID: 19470657

44. Cumplido-Laso G, Medina-Puche L, Moyano E, Hoffmann T, Sinz Q, Ring L, et al. The fruit ripening-related gene *FaAAT2* encodes an acyl transferase involved in strawberry aroma biogenesis. *J Exp Bot*. 2012; 63: 4275–4290. <https://doi.org/10.1093/jxb/ers120> PMID: 22563120
45. Molina-Hidalgo FJ, Franco AR, Villatoro C, Medina-Puche L, Mercado JA, Hidalgo MA, et al. The strawberry (*Fragaria × ananassa*) fruit-specific *rhamnogalacturonate lyase 1 (FaRGLyase1)* gene encodes an enzyme involved in the degradation of cell-wall middle lamella. *J Exp Bot*. 2013; 64: 1471–83. <https://doi.org/10.1093/jxb/ers386> PMID: 23564958
46. Pedersen S, Amtssygehus A. Multiplex relative gene expression analysis by real-time RT-PCR using the iCycler iQ™ detection system. *BioRadiations (BioRad)*. 2001; 107: 10–11.
47. Su H, Zhang S, Yin Y, Zhu D, Han L. Genome-wide analysis of NAM-ATAF1,2-CUC2 transcription factor family in *Solanum lycopersicum*. *J Plant Biochem Biotechnol*. 2015; 24: 176–183 <https://doi.org/10.1007/s13562-014-0255-9>
48. Gong W, Shen YP, Ma LG, McWilliam H, Li W, Uludag M, et al. Genome-wide ORFome cloning and analysis of Arabidopsis transcription factor genes. *Plant Physiol*. 2004; 135: 773–782 <https://doi.org/10.1104/pp.104.042176> PMID: 15208423
49. Pinheiro GL, Marques CS, Costa MD, Reis PA, Alves MS, Carvalho CM, et al. Complete inventory of soybean NAC transcription factors: sequence conservation and expression analysis uncover their distinct roles in stress response. *Gene*. 2009; 444: 10–23. <https://doi.org/10.1016/j.gene.2009.05.012> PMID: 19497355
50. Wang YX, Liu ZW, Wu ZJ, Li H, Zhuang J. Transcriptome-wide identification and expression analysis of the NAC gene family in tea plant [*Camellia sinensis* (L.) O. Kuntze]. *PLoS One*. 2016; 11(11): e0166727. <https://doi.org/10.1371/journal.pone.0166727> PMID: 27855193
51. Singh AK, Sharma V, Pa AK, Acharya V, Ahuja PS. Genome-wide organization and expression profiling of the NAC transcription factor family in potato (*Solanum tuberosum* L.). *DNA Res*. 2013; 20: 403–23. <https://doi.org/10.1093/dnares/dst019> PMID: 23649897
52. Hu W, Wei Y, Xia Z, Yan Y, Hou X, Zou M, et al. Genome-wide identification and expression analysis of the NAC transcription factor family in Cassava. *PLoS One*. 2015; 10(8):e0136993. <https://doi.org/10.1371/journal.pone.0136993> PMID: 26317631
53. Benjamini Y, Hochberg Y. Controlling the false discovery rate: a practical and powerful approach to multiple testing. *J R Statist Soc B*. 1995; 57: 289–300.
54. Almeida JR, D'Amico E, Preuss A, Carbone F, de Vos CH, Deiml B, et al. Characterization of major enzymes and genes involved in flavonoid and proanthocyanidin biosynthesis during fruit development in strawberry (*Fragaria x ananassa*). *Arch Biochem Biophys*. 2007; 465: 61–71. <https://doi.org/10.1016/j.abb.2007.04.040> PMID: 17573033
55. Moyano-Cañete E, Bellido ML, García-Caparrós N, Medina-Puche L, Amil-Ruiz F, González-Reyes JA, et al. *FaGAST2*, a strawberry ripening-related gene, acts together with *FaGAST1* to determine cell size of the fruit receptacle. *Plant Cell Physiol*. 2013; 54: 218–36. <https://doi.org/10.1093/pcp/pcs167> PMID: 23231876
56. Vallarino JG, Osorio S, Bombarely A, Casañal A, Cruz-Rus E, Sánchez-Sevilla JF, Amaya I, et al. Central role of FaGAMYB in the transition of the strawberry receptacle from development to ripening. *New Phytol*. 2015; 208:482–96. <https://doi.org/10.1111/nph.13463> PMID: 26010039
57. Xu X, Yin L, Ying Q, Song H, Xue D, Lai T, et al. High-throughput sequencing and degradome analysis identify miRNAs and their targets involved in fruit senescence of *Fragaria ananassa*. *PLoS One*. 2013; 8(8):e70959. <https://doi.org/10.1371/journal.pone.0070959> PMID: 23990918
58. Estrada-Johnson E, Csukasi F, Pizarro CM, Vallarino JG, Kiryakova Y, Vioque A, et al. Transcriptomic analysis in strawberry fruits reveals active auxin biosynthesis and signaling in the ripe receptacle. *Front Plant Sci*. 2017; 8:889 <https://doi.org/10.3389/fpls.2017.00889> PMID: 28611805
59. Creelman RA, Bell E, Mullet JE. Involvement of a lipoxygenase-like enzyme in abscisic acid biosynthesis. *Plant Physiol*. 1992; 99: 1258–60. <https://doi.org/10.1104/pp.99.3.1258> PMID: 16668998
60. Castellarin SD, Matthews MA, Di Gasparo G, Gambetta GA. Water deficits accelerate ripening and induce changes in gene expression regulating flavonoid biosynthesis in grape berries. *Planta*. 2007; 227: 101–112. <https://doi.org/10.1007/s00425-007-0598-8> PMID: 17694320
61. Jia H, Jiu S, Zhang C, Wang C, Tariq P, Liu Z, et al. Abscisic acid and sucrose regulate tomato and strawberry fruit ripening through the abscisic acid-stress-ripening transcription factor. *Plant Biotechnol J*. 2016; 14: 2045–65. <https://doi.org/10.1111/pbi.12563> PMID: 27005823
62. Wei S, Gao L, Zhang Y, Zhang F, Yang X, Huang D. Genome-wide investigation of the NAC transcription factor family in melon (*Cucumis melo* L.) and their expression analysis under salt stress. *Plant Cell Rep*. 2016; 35: 1827–1839. <https://doi.org/10.1007/s00299-016-1997-8> PMID: 27229006

63. Shiriga K, Sharma R, Kuma K, Yadav SK, Hossain F, Thirunavukkarasu N. Genome-wide identification and expression of drought-responsive members of the NAC family in maize. *Meta Gene*. 2014; 2: 407–417. <https://doi.org/10.1016/j.mgene.2014.05.001> PMID: 25606426
64. You J, Zhang L, Song B, Qi X, Chan Z. Systematic analysis and identification of stress-responsive genes of the NAC gene family in *Brachypodium distachyon*. *PLoS One*. 2015; 10:e0122027. <https://doi.org/10.1371/journal.pone.0122027> PMID: 25815771
65. Zheng X, Tang S, Zhu S, Dai Q, Liu T. Identification of an NAC transcription factor family by deep transcriptome sequencing in onion (*Allium cepa* L.). *PLoS One*. 2016; 11: e0157871. <https://doi.org/10.1371/journal.pone.0157871> PMID: 27331904
66. Wu Z, Xu X, Xiong W, Wu P, Chen Y, Li M, et al. Genome-wide analysis of the NAC gene family in physic nut (*Jatropha curcas* L.). *PLoS One*. 2015; 10:e0131890. <https://doi.org/10.1371/journal.pone.0131890> PMID: 26125188
67. Ling L, Song L, Wang Y, Guo C. Genome-wide analysis and expression patterns of NAC transcription factor family in *Medicago truncatula*. *Physiol Mol Biol Plants*. 2017; 23: 343–356. <https://doi.org/10.1007/s12298-017-0421-3> PMID: 28461723
68. Tranbarger TJ, Fooyontphanich K, Roongsattham P, Pizot M, Collin M, Jantasuriyarat C, et al. Transcriptome Analysis of Cell Wall and NAC Domain Transcription Factor Genes during *Elaeis guineensis* Fruit Ripening: Evidence for Widespread Conservation within Monocot and Eudicot Lineages. *Front Plant Sci*. 2017; 8: 603. <https://doi.org/10.3389/fpls.2017.00603> PMID: 28487710
69. Hussey SG, Mizrahi E, Spokevicius AV, Bossinger G, Berger DK, Myburg AA. SND2, a NAC transcription factor gene, regulates genes involved in secondary cell wall development in Arabidopsis fibres and increases fibre cell area in Eucalyptus. *BMC Plant Biol*. 2011; 11–173.
70. Yamaguchi M, Ohtani M, Mitsuda N, Kubo M, Ohme-Takagi M, Fukuda H, Demura T. VND-INTERACTING2, a NAC domain transcription factor, negatively regulates xylem vessel formation in Arabidopsis. *Plant Cell*. 2010; 22: 1249–63. <https://doi.org/10.1105/tpc.108.064048> PMID: 20388856
71. Cao Y, Zhai J, Wang Q, Yuan H, Huang X. Function of *Hevea brasiliensis* NAC1 in dehydration-induced laticifer differentiation and latex biosynthesis. *Planta*. 2017; 245: 31–44. <https://doi.org/10.1007/s00425-016-2589-0> PMID: 27544199
72. Oda-Yamamizo C, Mitsuda N, Sakamoto S, Ogawa D, Ohme-Takagi M, Ohmiya A. The NAC transcription factor ANAC046 is a positive regulator of chlorophyll degradation and senescence in Arabidopsis leaves. *Sci Rep*. 2016; 6:23609. <https://doi.org/10.1038/srep23609> PMID: 27021284
73. Lira BS, Gramegna G, Trench BA, Alves FRR, Silva EM, Silva GFF, M et al. Manipulation of a Senescence-Associated Gene Improves Fleshy Fruit Yield. *Plant Physiol*. 2017; 175(1):77–91.
74. Pei H, Ma N, Tian J, Luo J, Chen J, Li J, et al. An NAC transcription factor controls ethylene-regulated cell expansion in flower petals. *Plant Physiol*. 2013 Oct; 163(2):775–91. <https://doi.org/10.1104/pp.113.223388> PMID: 23933991
75. Knee M, Sargent JA, Osborne DJ. Cell wall metabolism in developing strawberry fruits. *J Exp Bot*. 1977; 28:377–396.
