# Supplementary material for: Genome-wide analysis of the NAC transcription factor family and their expression during the development and ripening of the Fragaria × ananassa fruits
Source: PLoS One. 2018 May 3;13(5):e0196953. doi: 10.1371/journal.pone.0196953 (PMC5933797; doi:10.1371/journal.pone.0196953)
Supplement: S10 Table — Magnitudes of relative induction to ripe receptacles (fold change), adjusted p.value (≤0.01) and the total signal intensity for each feature on microarrays platform in arbitrary units of intensity (a.u.i.) are given. Gene ID as reported in Fragaria vesca Genome Database (http://www.strawberrygenome.org/). (XLSX) [file pone.0196953.s010.xlsx]

## Sheet: Hoja1
Gene name v4.0.a1	NAC Name	Gene name v2.0.a1	Red vs. Green (Fold Change)	p-value	Red-linear (a.u.i)	Green-linear (a.u.i.)
FvH4_1g06530.1	FvNAC001	gene11344	12,735 down	0.00108	4.125	52.528
FvH4_1g09330.1	FvNAC002	gene12934	1,136 up	0.43	2.244	1.975
FvH4_1g12050.1	FvNAC003	gene14868	9,759 down	0.266	10.157	99.119
FvH4_1g25150.1	FvNAC004	gene24179	2,643 down	0.003	157.033	415.186
FvH4_1g27330.1	FvNAC005	gene31658	30,724 down	0.000708	6.809	209.213
FvH4_1g27900.1	FvNAC006	gene20686	19,689 up	0.000379	1754.34	89.098
FvH4_2g00240.1	FvNAC007	gene31175	1,088 up	0.565	136.396	125.33
FvH4_2g12690.1	FvNAC008	gene27539	1,109 up	0.0753	9343.31	8421.63
FvH4_2g13320.1	FvNAC009	gene27614	1,704 up	0.00454	469.074	275.158
FvH4_2g13330.1	FvNAC010	gene27615	2,185 up	0.00194	776.057	355.122
FvH4_2g16180.1	FvNAC011	gene17203	8,759 down	0.00282	35.678	312.536
FvH4_2g18690.1	FvNAC012	gene17589	1,008 down	0.86	2.21	2.23
FvH4_2g18880.1	FvNAC013	gene17610	1,522 up	0.47	6.237	4.096
FvH4_2g21280.1	FvNAC014	gene08112	2,019 up	0.118	8.852	4.383
FvH4_2g27430.1	FvNAC015	gene11226	1,875 up	0.00172	15948.5	8505.4
FvH4_2g34080.1	FvNAC016	gene09127	1,567 up	0.00991	188.509	120.252
FvH4_2g36350.1	FvNAC017	gene08765	2,792 up	0.00753	6.89	2.467
FvH4_2g40240.1	FvNAC018	gene15095	2,988 up	0.00198	149.85	50.149
FvH4_3g03540.1	FvNAC019	gene30749	4,811 up	0.00361	261.632	54.376
FvH4_3g03580.1	FvNAC020	gene30746	3,636 up	0.0406	24.762	6.809
FvH4_3g04630.1	FvNAC021	gene30439	5,159 up	0.000559	1275.9	247.298
FvH4_3g08490.1	FvNAC022	gene29766	23,533 up	0.00052	3718.7	158.017
FvH4_3g11860.1	FvNAC023	gene20078	5,058 up	0.00307	152.852	30.219
FvH4_3g13550.1	FvNAC024	gene19898	1,404 up	0.129	20.051	14.278
FvH4_3g13980.1	FvNAC025	gene19716	7,780 down	0.0079	5.677	44.169
FvH4_3g15610.1	FvNAC026	gene30051	1,502 up	0.174	7.976	5.308
FvH4_3g16040.1	FvNAC027	gene10469	1,038 up	0.75	2.51	2.418
FvH4_3g16910.1	FvNAC028	gene31798	7,345 up	0.000736	16.52	2.249
FvH4_3g18170.1	FvNAC029	gene27279	1,013 up	0.769	2.228	2.198
FvH4_3g18460.1	FvNAC030	gene27240	1,070 down	0.443	1.96	2.099
FvH4_3g18930.1	FvNAC031	gene00151	2,424 down	0.492	2.568	6.226
FvH4_3g18940.1	FvNAC032	gene27184	1,332 down	0.103	2.045	2.726
FvH4_3g19410.1	FvNAC033	gene00971	11,649 up	0.000512	116.559	10.005
FvH4_3g20690.1	FvNAC034	gene31149	1,190 up	0.0632	3459.42	2906.72
FvH4_3g20700.1	FvNAC035	gene31150	3,537 up	0.00974	4584.79	1296.18
FvH4_3g25200.1	FvNAC036	gene21755	1,395 down	0.402	1.879	2.621
FvH4_3g25470.1	FvNAC037	gene21734	1,665 down	0.0198	1.916	3.191
FvH4_3g25560.1	FvNAC038	gene08427	1,160 down	0.629	2.711	3.147
FvH4_3g28570.1	FvNAC039	gene14711	2,172 up	0.222	21.778	10.023
FvH4_3g32720.1	FvNAC040	gene04766	1,049 down	0.402	2.328	2.444
FvH4_4g12410.1	FvNAC041	gene22263	1,187 up	0.476	3.059	2.577
FvH4_4g23130.1	FvNAC042	gene07251	2,483 up	0.00157	12917.7	5200.54
FvH4_4g28090.1	FvNAC043	gene03875	1,528 down	0.00376	208.777	319.035
FvH4_4g30290.1	FvNAC044	gene04636	5,829 up	0.00188	31.693	5.436
FvH4_4g31070.1	FvNAC045	gene04717	1,645 up	0.00268	456.515	277.367
FvH4_4g31420.1	FvNAC046	gene04749	1,003 down	0.936	2.044	2.051
FvH4_5g00350.1	FvNAC047	gene32254	1,957 down	0.0998	2.742	5.367
FvH4_5g05980.1	FvNAC048	gene31798	7,345 up	0.000736	16.52	2.249
FvH4_5g09000.1	FvNAC049	gene06460	2,743 down	0.00135	46.649	127.985
FvH4_5g10350.1	FvNAC050	gene01851	1,111 up	0.145	1557.85	1402.14
FvH4_5g10690.1	FvNAC051	gene01881	15,486 down	0.000475	6.729	104.212
FvH4_5g12090.1	FvNAC052	gene25163	1,515 down	0.413	2.178	3.301
FvH4_5g14080.1	FvNAC053	gene25794	1,023 down	0.591	1.999	2.046
FvH4_5g14170.1	FvNAC054	gene25783	8,522 down	0.00576	19.883	169.454
FvH4_5g14670.1	FvNAC055	gene26043	1,879 up	0.00608	298.782	158.997
FvH4_5g18130.1	FvNAC056	gene09293	34,997 down	0.000554	1.809	63.306
FvH4_5g21670.1	FvNAC057	gene10722	1,857 down	0.00903	27.279	50.664
FvH4_5g25360.1	FvNAC058	gene20482	1,151 down	0.436	1.965	2.263
FvH4_5g25510.1	FvNAC059	gene20500	2,170 down	0.00175	1.845	4.006
FvH4_5g25960.1	FvNAC060	gene31474	3,863 down	0.00231	29.009	112.082
FvH4_5g27330.1	FvNAC061	gene29260	1,681 down	0.0724	13.215	22.223
FvH4_5g27620.1	FvNAC062	gene29106	1,139 down	0.527	1.962	2.237
FvH4_5g27760.1	FvNAC063	gene29106	1,139 down	0.527	1.962	2.237
FvH4_5g29430.1	FvNAC064	gene10901	3,654 up	0.104	7.598	2.079
FvH4_5g29460.1	FvNAC065	gene10904	1,089 up	0.677	4.163	3.822
FvH4_5g30540.1	FvNAC066	gene02016	1,517 up	0.339	6.876	4.53
FvH4_5g30580.1	FvNAC067	gene33750	3,094 down	0.0106	7.791	24.114
FvH4_5g30600.1	FvNAC068	gene33131	2,728 down	0.0012	436.918	1192.15
FvH4_5g31040.1	FvNAC069	gene07822	1,007 up	0.87	1.988	1.974
FvH4_5g34450.1	FvNAC070	gene26542	1,109 down	0.105	294.142	326.374
FvH4_5g34910.1	FvNAC071	gene12168	1,014 up	0.729	1.789	1.763
FvH4_5g35290.1	FvNAC072	gene12133	1,332 up	0.382	2.928	2.198
FvH4_6g05730.1	FvNAC073	gene22559	2,078 up	0.415	3.89	1.872
FvH4_6g05740.1	FvNAC074	gene22558	1,012 down	0.762	1.964	1.988
FvH4_6g06070.1	FvNAC075	gene22522	7,855 up	0.0125	44.526	5.668
FvH4_6g07970.1	FvNAC076	gene00252	1,767 up	0.136	25.899	14.654
FvH4_6g15670.1	FvNAC077	gene09702	1,772 up	0.0832	5.983	3.376
FvH4_6g17240.1	FvNAC078	gene00951	1,008 up	0.863	1.907	1.892
FvH4_6g19430.1	FvNAC079	gene15644	2,610 down	0.0993	4.483	11.704
FvH4_6g23460.1	FvNAC080	gene25284	1,751 up	0.153	5.03	2.872
FvH4_6g23470.1	FvNAC081	gene25225	1,009 up	0.821	2.066	2.046
FvH4_6g26330.1	FvNAC082	gene17721	1,052 up	0.366	2.155	2.048
FvH4_6g26730.1	FvNAC083	gene17762	15,773 down	0.000727	2.196	34.641
FvH4_6g33050.1	FvNAC084	gene23099	2,074 up	0.21	4.754	2.292
FvH4_6g38750.1	FvNAC085	gene28762	4,559 up	0.0928	29.318	6.43
FvH4_6g39190.1	FvNAC086	gene22722	1,079 up	0.557	2.141	1.984
FvH4_6g39200.1	FvNAC087	gene22722	1,079 up	0.557	2.141	1.984
FvH4_6g39580.1	FvNAC088	gene24344	1,369 up	0.0204	11.843	8.65
FvH4_6g39600.1	FvNAC089	gene24342	1,470 down	0.421	5.351	7.868
FvH4_6g46670.1	FvNAC090	gene04249	1,051 up	0.352	4813.47	4577.22
FvH4_6g47070.1	FvNAC091	gene04303	1,645 up	0.00333	1392.58	846.26
FvH4_6g48120.1	FvNAC092	gene04424	5,614 up	0.000807	1212.35	215.92
FvH4_6g48740.1	FvNAC093	gene03833	1,032 down	0.89	24.818	25.625
FvH4_6g51660.1	FvNAC094	gene27940	1,404 up	0.0512	22.605	16.096
FvH4_6g54000.1	FvNAC095	gene01364	1,009 down	0.986	12.66	12.779
FvH4_7g06500.1	FvNAC096	gene23560	1,472 up	0.00423	5113.61	3471.73
FvH4_7g06570.1	FvNAC097	gene23552	3,024 down	0.0247	2.038	6.164
FvH4_7g11470.1	FvNAC098	gene03910	2,356 up	0.142	15.648	6.64
FvH4_7g12150.1	FvNAC099	gene19382	2,155 up	0.00818	17.193	7.977
FvH4_7g17540.1	FvNAC100	gene18636	2,594 down	0.0253	2.285	5.927
FvH4_7g17550.1	FvNAC101	gene18635	2,834 down	0.0648	2.208	6.258
FvH4_7g17950.1	FvNAC102	gene35014	3,719 down	0.00737	5.819	21.645
FvH4_7g18000.1	FvNAC103	gene35013	1,520 down	0.0185	231.714	352.407
FvH4_7g18010.1	FvNAC104	gene35011	1,660 up	0.131	38.304	23.062
FvH4_7g18020.1	FvNAC105	gene18590	1,042 up	0.604	2.113	2.027
FvH4_7g18040.1	FvNAC106	gene18589	1,390 up	0.169	40.308	28.992
FvH4_7g18070.1	FvNAC107	gene23394	2,220 down	0.0052	129.273	287.108
FvH4_7g18200.1	FvNAC108	gene34005	2,264 down	0.00581	39.233	88.856
FvH4_7g18210.1	FvNAC109	gene34004	2,017 down	0.00373	40.982	82.69
FvH4_7g18250.1	FvNAC110	gene34005	2,264 down	0.00581	39.233	88.856
FvH4_7g18260.1	FvNAC111	gene34006	2,155 down	0.00724	71.858	154.863
FvH4_7g27750.1	FvNAC112	gene21248	7,924 down	0.0195	2.244	17.781
S10 Table: Microarray data from transcriptomic comparison between red and green fruits for FvNAC genes. Magnitudes of relative induction to ripe receptacles (fold change), p value (≤0.01) and the total signal intensity for each features on microarrays platform in arbitrary units of intensity (a.u.i.) are given. Gene name as reported in Fragaria vesca Genome Database (http://www.strawberrygenome.o…
