# Supplementary material for: Genome-wide analysis of the NAC transcription factor family and their expression during the development and ripening of the Fragaria × ananassa fruits
Source: PLoS One. 2018 May 3;13(5):e0196953. doi: 10.1371/journal.pone.0196953 (PMC5933797; doi:10.1371/journal.pone.0196953)
Supplement: S11 Table — Data is extracted from HPLC-MS quantitative analysis published elsewhere [5]. (XLSX) [file pone.0196953.s011.xlsx]

## Sheet: Hoja1
Experiement	ABA CONTENT (nmol*gr-1)
Control Water Stress	9.04 ± 1.73
Water Stress	99.96 ± 12.61
Control 8d	86.73 ± 4.91
NDGA 8 d	38.69 ± 1.50
S11 Table. ABA content in fruit. Data is extracted from HPLC-MS quantitative analysis published elsewhere [5].
